# Supplementary material
Source: Preprints.org preprint supplement (doi:10.20944/preprints202110.0096.v1)
Supplement: Supplementary file 1 [file supplementary]

## Sheet: Health_Bedbugs_Master_SPSS
health_self_rated	health_self_rated_dichotomised	avg_hours_sleep_per_day	avg_hours_sleep_per_day_dichotomised	bedbug_infestation	bedbugs_severely_troubled_past_year	physical_health_affect	mental_emotional_health_affect	sleep_affect	physical_appearance_affect	work_academic_performance_affect	social_activities_affect	avoid_home_affect	spend_money_on_med_or_doctor_affect	bites_past_month	whole_body	head_neck	chest_back	belly	arms	legs	red_swell_skin	itchiness	pain_bite_site	bleeding	fever	difficulties_breathing	headache	sleep_difficulties_restlessness	blisters	daytime_time_of_bite	night_time_of_bite	sleep_time_of_bite	watching_TV_time_of_bite	holding_clothes_umbrellas_time_of_bite	irregularly_time_of_bite	sex	age	education_level	monthly_household_income	case_weight_sex_age
2	0	1	0	0																																0	0	2	4	0.597429
2	0	1	0	0																																0	0	2	2	0.597429
3	0	1	0	0																																1	1	2	3	0.75822
3	0	1	0	3	2	1	2	3	1	2	2	2	2	3	1	0	0	0	0	0	1	1	1	0	0	0	0	1	0	0	1	1	1	0	0	1	1	1	2	0.75822
3	0	0	0	0																																0	0	2	2	0.597429
3	0	1	0	2	3	2	2	2	2	2	1	3	2	1	0	0	0	1	1	0	1	1	0	0	0	0	0	0	0	0	0	1	1	0	0	1	1	2	3	0.75822
3	0	1	0	3	3	3	2	3	2	2	2	3	2	3	1	0	0	0	0	0	1	1	0	0	0	0	0	0	0	0	1	1	0	0	0	1	0	2	2	1.16791
3	0	2	1	0																																0	2	2	2	1.31777
3	0	1	0	4	3	2	2	3	3	1	1	2	3	3	1	0	0	0	0	0	1	1	0	0	0	0	0	0	0	0	0	1	0	0	0	0	2	2	3	1.31777
4	0	1	0	2	4	2	3	3	2	3	2	3	2	1	0	0	0	0	1	1	1	1	0	0	0	0	0	0	0	0	0	1	0	0	0	0	1	2	2	0.514899
4	0	0	0	3	3	3	3	3	3	3	3	3	3	2	1	0	0	0	0	0	1	1	1	0	0	0	0	1	0	0	0	1	0	0	0	1	1	2	2	0.75822
4	0	2	1	4	4	1	1	3	1	1	1	3	2	2	0	0	1	0	1	1	0	1	0	0	0	0	0	0	0	0	0	0	0	0	1	1	0	2	2	1.16791
4	0	1	0	4	4	3	3	3	2	2	2	2	3	3	0	1	0	0	1	1	1	1	0	1	0	0	0	1	0	0	1	1	0	0	1	0	1	2	2	0.514899
4	0	2	1	0																																1	0	2	2	1.16791
4	0	1	0	1	2	1	1	1	1	1	1	1	1	1	0	0	0	0	1	1	1	1	1	0	1	0	0	0	0	0	0	0	0	0	1	1	1	2	2	0.75822
4	0	1	0	3	4	1	1	1	1	0	0	1	1	2	1	0	0	0	0	0	1	1	0	0	0	0	0	0	0	0	1	1	0	0	0	0	1	2	2	0.514899
4	0	0	0	3	4	1	2	3	2	2	1	1	0	3	0	0	0	0	1	1	1	1	0	0	0	0	0	0	0	0	1	1	0	0	0	0	1	1	2	0.514899
4	0	1	0	1	3	2	2	2	2	2	1	1	2	1	0	0	0	0	1	1	1	1	0	0	0	0	0	1	0	0	0	0	0	0	1	0	2	2	2	1.31777
5	0	1	0	2	3	2	2	2	2	2	2	2	2	2	1	0	0	0	0	0	1	1	0	0	0	0	0	0	0	0	0	0	0	0	1	0	1	1	2	0.514899
5	0	1	0	3	3	2	3	3	3	2	2	2	2	1	0	0	0	0	1	1	1	1	0	0	0	0	0	0	0	0	0	0	0	0	1	0	1	1	2	0.514899
5	0	2	1	0																																0	1	2	2	0.514899
5	0	1	0	0																																0	2	2	3	1.31777
5	0	1	0	1	3	0	1	1	0	1	0	0	0	2	0	0	0	0	1	1	0	1	0	0	0	0	0	0	0	0	0	0	0	0	1	0	2	1	2	1.31777
5	0	2	1	3	3	1	2	2	0	1	0	0	0	3	0	0	0	0	0	1	0	1	0	0	0	0	0	0	0	0	0	1	0	0	0	0	2	2	3	1.31777
5	0	1	0	3	4	2	2	2	1	1	1	1	1	2	1	1	0	0	1	1	1	1	0	0	0	0	0	0	0	0	0	0	0	0	1	0	1	1	2	0.514899
5	0	1	0	0																																1	0	2	3	1.16791
5	0	0	0	0																																0	1	2	2	0.514899
5	0	2	1	1	0	0	0	0	0	0	0	0	0	0	0	0	0	0	0	1	0	1	0	0	0	0	0	0	0	0	0	0	0	0	1	1	2	1	2	2.0347
5	0	1	0	3	2	1	2	2	1	2	2	2	2	1	0	0	0	0	0	1	1	1	0	0	0	0	0	0	0	0	0	0	0	0	1	1	1	2	2	0.75822
5	0	0	0	4	4	3	3	3	1	3	1	3	3	2	1	0	0	0	0	0	1	1	1	0	0	0	0	0	0	1	1	1	0	0	0	0	1	2	3	0.514899
5	0	1	0	0																																0	0	2	2	0.597429
5	0	0	0	0																																0	1	2	3	0.514899
5	0	0	0	0																																0	2	2	2	1.31777
5	0	2	1	2	2	2	1	2	1	1	1	1	2	1	0	1	0	0	1	1	0	1	0	0	0	0	0	1	0	0	1	1	0	0	0	1	1	1	2	0.75822
5	0	2	1	4	3	3	3	3	1	1	1	1	1	3	1	0	0	0	0	0	1	1	0	0	0	0	0	0	0	1	1	1	0	0	0	1	1	2	2	0.75822
5	0	0	0	4	4	1	3	3	1	0	3	3	3	3	0	1	0	0	1	1	1	1	0	0	0	0	0	0	0	0	0	1	0	0	0	1	2	2	2	2.0347
5	0	0	0	1	1	0	0	0	0	0	0	0	0	0	0	0	0	0	0	0	0	0	0	0	0	0	0	0	0	0	0	0	0	0	0	0	1	2	2	0.514899
5	0	1	0	2	1	0	0	0	0	0	0	0	0	0	0	0	0	0	0	0	0	0	0	0	0	0	0	0	0	0	0	0	0	0	0	0	1	1	2	0.514899
5	0	1	0	2	3	1	1	1	0	0	0	1	0	3	0	1	1	1	1	1	1	1	1	0	0	0	0	0	0	1	1	1	0	0	0	0	0	2	2	0.597429
5	0	1	0	0																																1	1	2	2	0.75822
5	0	2	1	3	3	2	3	3	1	0	2	2	1	2	1	1	1	0	1	1	1	1	1	0	0	0	0	1	0	0	0	1	0	0	1	1	1	2	2	0.75822
5	0	1	0	0																																1	1	2	2	0.75822
5	0	2	1	2	3	1	1	2	2	2	2	2	2	2	1	0	0	0	0	0	1	1	0	0	0	0	0	0	0	0	0	1	0	0	0	1	1	2	3	0.75822
5	0	1	0	4	4	3	3	3	3	1	0	3	3	3	0	0	0	1	1	1	1	1	0	0	0	0	0	1	0	0	0	0	0	0	1	0	0	2	2	0.597429
5	0	1	0	1	2	2	2	2	2	0	0	0	0	1	0	0	0	1	0	1	0	1	1	0	0	0	0	1	0	0	0	0	0	0	1	0	2	2	4	1.31777
5	0	2	1	2	2	2	2	2	2	2	2	2	2	0	0	0	0	0	0	0	0	0	0	0	0	0	0	0	0	0	0	0	0	0	0	0	1	2	4	0.514899
6	1	2	1	0																																0	0	2	4	0.597429
6	1	1	0	0																																0	1	2	2	0.514899
6	1	2	1	2	3	1	1	1	1	0	0	0	2	3	0	0	0	0	1	1	1	1	0	0	0	0	0	0	0	0	0	0	0	0	1	1	1	1	2	0.75822
6	1	2	1	3	3	1	2	1	0	2	1	0	0	2	0	0	0	0	1	1	0	1	0	0	0	0	0	0	0	0	1	1	0	0	0	1	1	2	3	0.75822
6	1	2	1	0																																0	0	2	2	0.597429
6	1	1	0	1	3	2	1	2	2	1	1	1	2	2	0	0	0	0	1	1	1	1	1	0	0	0	0	1	0	0	0	0	0	0	1	0	1	1	2	0.514899
6	1	1	0	0																																1	1	2	2	0.75822
6	1	2	1	0																																0	0	1	3	0.597429
6	1	2	1	0																																0	0	1	3	0.597429
6	1	2	1	0																																1	0	1	2	1.16791
6	1	2	1	1	1	0	0	0	0	0	0	0	0	2	0	0	0	0	1	1	0	1	0	0	0	0	0	0	0	0	1	0	0	0	0	0	0	2	2	0.597429
6	1	2	1	1	1	0	0	0	0	0	0	0	0	0	0	0	0	0	0	0	0	0	0	0	0	0	0	0	0	0	0	0	0	0	0	0	0	2	3	0.597429
6	1	1	0	2	2	2	1	2	1	1	1	1	2	2	0	0	0	0	1	1	0	1	0	0	0	0	0	0	0	0	0	0	0	0	1	1	2	2	2	2.0347
6	1	1	0	0																																1	1	2	3	0.75822
6	1	1	0	1	3	1	1	1	1	0	0	0	0	1	0	0	0	0	1	1	1	1	0	0	0	0	0	0	0	1	0	0	0	0	0	0	1	2	3	0.514899
6	1	3	1	1	1	0	0	0	0	0	0	0	0	0	0	0	0	0	0	0	0	0	0	0	0	0	0	0	0	0	0	0	0	0	0	0	1	2	3	0.514899
6	1	2	1	1	1	0	0	0	0	0	0	0	0	0	0	0	0	0	0	0	0	0	0	0	0	0	0	0	0	0	0	0	0	0	0	0	2	2	2	1.31777
6	1	0	0	2	3	1	2	1	2	0	0	1	0	2	0	0	0	0	1	1	1	1	0	0	0	0	0	0	0	1	1	1	0	0	0	0	0	2	4	0.597429
6	1	1	0	2	2	1	2	1	1	1	1	1	2	1	0	1	0	0	0	0	1	1	0	0	0	0	0	0	0	0	0	0	0	0	1	0	0	2	2	0.597429
6	1	1	0	3	4	0	0	0	0	0	0	0	0	1	0	0	0	0	0	1	0	1	0	0	0	0	0	0	0	0	0	0	0	0	1	0	1	1	3	0.514899
6	1	2	1	4	3	1	3	2	2	2	2	2	3	1	1	0	0	0	0	0	1	1	1	0	0	0	0	0	0	0	0	1	0	0	0	0	0	2	2	0.597429
6	1	1	0	1	2	0	0	0	0	0	0	0	0	1	0	0	1	0	0	0	0	1	0	0	0	0	0	0	0	0	0	0	0	0	1	1	1	2	4	0.75822
6	1	2	1	3	4	2	3	2	1	2	2	1	1	2	0	1	0	0	1	0	0	1	0	0	0	0	0	0	0	0	0	1	1	0	0	0	1	2	3	0.514899
6	1	1	0	0																																0	0	2	2	0.597429
6	1	2	1	0																																0	1	2	3	0.514899
6	1	1	0	0																																1	1	1	2	0.75822
6	1	2	1	3	2	1	0	1	2	0	0	0	0	2	0	0	0	0	1	1	1	1	0	0	0	0	0	0	0	0	0	0	0	0	1	0	0	2	2	0.597429
6	1	2	1	3	3	1	2	2	1	1	1	1	1	1	0	0	0	1	1	0	1	1	0	0	0	0	0	1	0	0	0	1	0	0	0	0	0	2	2	0.597429
6	1	2	1	0																																0	0	2	3	0.597429
6	1	0	0	0																																0	1	2	2	0.514899
6	1	0	0	1	2	0	1	2	0	0	0	1	0	3	0	0	0	0	0	1	1	1	0	0	0	0	0	0	0	0	1	1	0	0	0	1	1	2	2	0.75822
6	1	2	1	2	3	1	1	1	0	0	0	2	0	1	0	0	0	0	1	0	1	1	0	0	0	0	0	0	0	1	1	0	0	0	0	0	0	2	2	0.597429
6	1	0	0	2	4	3	3	3	3	3	3	3	3	3	1	0	0	0	0	0	0	1	0	0	0	0	0	1	0	0	1	1	0	0	0	0	0	2	2	0.597429
6	1	1	0	0																																0	1	2	2	0.514899
6	1	1	0	0																																1	1	2	2	0.75822
6	1	1	0	2	2	1	3	3	1	1	2	2	1	0	0	0	0	1	1	1	1	1	0	0	0	0	0	0	0	0	0	1	0	0	0	0	1	2	2	0.514899
6	1	0	0	0																																0	0	2	4	0.597429
6	1	2	1	0																																0	3	2	2	4.88382
6	1	0	0	1	1	0	0	0	0	0	0	0	0	0	0	0	0	0	0	0	0	0	0	0	0	0	0	0	0	0	0	0	0	0	0	0	2	2	4	1.31777
6	1	3	1	1	1	0	0	0	0	0	0	0	0	0	0	0	0	0	0	0	0	0	0	0	0	0	0	0	0	0	0	0	0	0	0	1	2	2	4	2.0347
6	1	0	0	1	1	0	0	0	0	0	0	0	0	0	0	0	0	0	0	0	0	0	0	0	0	0	0	0	0	0	0	0	0	0	0	0	1	1	2	0.514899
6	1	1	0	2	2	2	1	1	2	1	1	0	1	2	0	1	0	0	1	1	1	1	0	0	0	0	0	0	0	0	1	0	0	0	0	1	1	2	3	0.75822
6	1	1	0	4	4	3	3	3	3	3	3	3	2	3	0	0	0	0	1	1	1	1	0	0	0	0	0	1	0	0	1	1	0	0	0	0	1	2	2	0.514899
6	1	1	0	3	2	0	1	2	1	0	0	0	0	1	0	0	0	0	1	1	0	1	0	0	0	0	0	0	0	1	0	1	0	0	0	0	1	2	2	0.514899
6	1	1	0	1	3	0	0	0	0	0	0	0	0	2	0	0	0	0	1	1	1	1	1	0	0	0	0	0	0	0	0	0	0	0	1	1	1	2	3	0.75822
6	1	1	0	0																																1	1	2	4	0.75822
6	1	1	0	2	2	1	2	2	1	1	1	2	1	1	0	0	0	0	1	0	0	1	0	0	0	0	0	0	0	0	0	0	0	0	1	1	0	2	2	1.16791
6	1	1	0	2	3	2	2	2	2	2	2	2	2	1	0	0	0	0	1	1	0	0	0	0	0	0	0	0	0	0	0	1	0	0	0	0	1	2	2	0.514899
6	1	1	0	4	3	1	2	2	0	0	0	0	2	2	0	0	0	0	0	1	1	1	1	0	0	0	0	0	0	0	0	1	0	0	0	0	1	2	4	0.514899
6	1	1	0	3	3	2	3	2	1	1	0	2	2	3	0	1	0	0	1	1	1	1	0	0	0	0	0	0	0	0	0	0	0	0	1	1	0	2	3	1.16791
6	1	2	1	0																																0	1	2	2	0.514899
6	1	0	0	2	1	0	0	0	0	0	0	0	0	0	0	0	0	0	0	0	0	0	0	0	0	0	0	0	0	0	0	0	0	0	0	0	1	2	3	0.514899
6	1	2	1	2	3	1	1	2	1	1	0	0	1	3	0	0	1	1	1	1	1	1	0	0	0	0	0	0	0	0	0	1	0	0	0	1	1	2	3	0.75822
6	1	3	1	0																																0	1	2	4	0.514899
7	1	0	0	1	1	0	0	0	0	0	0	0	0	0	0	0	0	0	0	0	0	0	0	0	0	0	0	0	0	0	0	0	0	0	0	1	0	2	2	1.16791
7	1	2	1	2	2	1	2	3	2	2	1	1	3	1	0	1	1	0	1	0	1	1	0	0	0	0	0	0	0	0	1	1	0	0	0	0	1	2	2	0.514899
7	1	1	0	0																																0	1	2	3	0.514899
7	1	1	0	0																																0	1	1	2	0.514899
7	1	2	1	1	2	1	1	0	1	1	0	1	1	2	0	0	0	0	1	1	0	1	0	0	0	0	0	0	0	0	0	0	0	0	1	1	0	2	2	1.16791
7	1	1	0	1	1	0	0	0	0	0	0	0	0	0	0	0	0	0	0	0	0	0	0	0	0	0	0	0	0	0	0	0	0	0	0	0	1	2	2	0.514899
7	1	2	1	1	0	0	0	0	0	0	0	0	0	0	0	0	0	0	0	0	0	0	0	0	0	0	0	0	0	0	0	0	0	0	0	1	2	2	3	2.0347
7	1	2	1	0																																0	0	2	2	0.597429
7	1	2	1	0																																1	1	2	3	0.75822
7	1	1	0	0																																0	2	2	2	1.31777
7	1	1	0	0																																1	0	1	3	1.16791
7	1	3	1	1	0	0	0	0	0	0	0	0	0	0	0	0	0	0	0	0	0	0	0	0	0	0	0	0	0	0	0	0	0	0	0	0	0	2	2	0.597429
7	1	0	0	1	1	0	0	0	0	0	0	0	0	0	0	0	0	0	0	0	0	0	0	0	0	0	0	0	0	0	0	0	0	0	0	0	1	2	3	0.514899
7	1	1	0	1	1	0	0	0	0	0	0	0	0	0	0	0	0	0	0	0	0	0	0	0	0	0	0	0	0	0	0	0	0	0	0	0	2	1	3	1.31777
7	1	0	0	1	1	0	0	0	0	0	0	0	0	0	0	0	0	0	0	0	0	0	0	0	0	0	0	0	0	0	0	0	0	0	0	1	2	1	2	2.0347
7	1	2	1	2	2	0	0	0	0	0	0	1	0	1	0	0	0	0	1	1	1	1	0	0	0	0	0	0	0	0	0	0	0	0	1	0	0	1	3	0.597429
7	1	1	0	3	4	2	2	2	1	2	1	2	2	3	0	0	1	0	1	1	1	0	0	0	0	0	0	0	0	0	0	1	1	0	0	0	1	2	3	0.514899
7	1	1	0	0																																0	1	2	2	0.514899
7	1	0	0	0																																0	2	2	2	1.31777
7	1	1	0	0																																0	0	1	2	0.597429
7	1	2	1	0																																1	1	1	3	0.75822
7	1	0	0	1	1	0	0	0	0	0	0	0	0	0	0	0	0	0	0	0	0	0	0	0	0	0	0	0	0	0	0	0	0	0	0	0	1	2	2	0.514899
7	1	0	0	1	0	0	0	0	0	0	0	0	0	0	0	0	0	0	0	0	0	0	0	0	0	0	0	0	0	0	0	0	0	0	0	1	1	2	4	0.75822
7	1	1	0	1	2	2	2	2	2	0	0	0	0	3	0	1	0	0	1	1	1	1	0	0	0	0	0	0	0	1	0	1	0	0	0	0	0	1	2	0.597429
7	1	1	0	2	2	1	2	2	2	1	1	2	1	3	0	1	0	0	1	1	1	1	0	0	0	0	0	1	0	1	0	1	0	0	0	0	1	2	4	0.514899
7	1	1	0	2	2	0	1	1	1	0	0	1	0	0	0	0	0	0	0	0	1	1	0	0	0	0	0	0	0	0	0	0	0	0	1	0	0	1	2	0.597429
7	1	3	1	2	3	2	2	1	1	1	1	3	2	3	0	0	0	1	1	1	1	1	0	0	0	0	0	0	0	0	1	1	0	0	0	1	1	1	2	0.75822
7	1	0	0	2	1	0	0	0	0	0	0	0	0	0	0	0	0	0	0	0	0	0	0	0	0	0	0	0	0	0	0	0	0	0	0	0	2	1	2	1.31777
7	1	1	0	4	3	2	3	3	3	3	3	3	2	1	0	1	1	0	1	1	1	1	1	0	0	0	0	0	0	0	1	1	1	0	0	0	2	1	2	1.31777
7	1	2	1	0																																1	0	2	2	1.16791
7	1	1	0	0																																0	1	2	3	0.514899
7	1	2	1	0																																1	2	2	3	2.0347
7	1	2	1	0																																1	2	2	3	2.0347
7	1	0	0	0																																0	0	1	2	0.597429
7	1	2	1	1	2	2	2	3	3	0	2	1	1	1	1	0	0	0	0	0	1	1	0	0	0	0	0	0	0	0	1	1	0	0	0	1	0	2	3	1.16791
7	1	1	0	1	1	0	0	0	0	0	0	0	0	0	0	0	0	0	0	0	0	0	0	0	0	0	0	0	0	0	0	0	0	0	0	0	0	1	3	0.597429
7	1	2	1	3	3	2	2	3	2	1	1	1	2	2	0	0	0	1	1	1	1	1	0	0	0	0	0	0	0	0	0	0	0	0	1	0	0	2	2	0.597429
7	1	2	1	0																																0	0	2	2	0.597429
7	1	0	0	1	1	0	0	0	0	0	0	0	0	0	0	0	0	0	0	0	0	0	0	0	0	0	0	0	0	0	0	0	0	0	0	0	0	2	2	0.597429
7	1	2	1	1	0	0	0	0	0	0	0	0	0	0	0	0	0	0	0	0	0	0	0	0	0	0	0	0	0	0	0	0	0	0	0	1	1	2	2	0.75822
7	1	2	1	0																																0	0	2	3	0.597429
7	1	3	1	0																																0	1	2	4	0.514899
7	1	2	1	0																																1	1	2	3	0.75822
7	1	0	0	0																																1	2	2	4	2.0347
7	1	1	0	0																																0	0	2	3	0.597429
7	1	2	1	0																																0	1	2	3	0.514899
7	1	2	1	0																																0	1	2	2	0.514899
7	1	3	1	0																																0	1	2	2	0.514899
7	1	2	1	0																																1	1	2	3	0.75822
7	1	2	1	0																																0	1	1	2	0.514899
7	1	1	0	0																																0	1	1	2	0.514899
7	1	2	1	1	2	0	0	0	0	0	0	0	0	1	0	1	0	0	0	1	0	1	0	0	0	0	0	0	0	0	0	1	1	0	0	0	1	2	4	0.514899
7	1	1	0	1	1	0	0	1	1	0	0	0	0	1	0	0	0	0	1	1	1	1	0	0	0	0	0	0	0	0	0	0	0	0	1	0	1	2	4	0.514899
7	1	2	1	1	1	0	0	0	0	0	0	0	0	0	0	0	0	0	0	0	0	0	0	0	0	0	0	0	0	0	0	0	0	0	0	0	2	2	2	1.31777
7	1	1	0	2	2	1	2	1	0	1	0	1	0	1	1	0	0	0	0	0	1	1	0	0	0	0	0	0	0	0	0	1	0	0	0	1	1	2	3	0.75822
7	1	2	1	2	2	2	2	2	2	2	2	2	2	0	0	0	0	0	0	1	0	1	1	0	0	0	0	0	0	0	0	1	0	0	0	0	1	2	4	0.514899
7	1	2	1	2	2	1	1	1	0	0	0	0	2	2	0	1	1	1	0	0	1	1	1	0	0	0	0	0	0	0	0	1	0	0	0	0	3	0	4	4.88382
7	1	0	0	3	4	3	3	3	3	3	3	3	3	1	1	0	0	0	1	1	1	1	1	0	0	0	0	1	0	0	0	0	0	0	1	1	0	1	2	1.16791
7	1	1	0	3	3	1	2	2	1	0	0	1	2	1	0	0	0	0	1	1	1	1	0	0	0	0	0	0	0	0	0	1	0	0	0	0	1	1	3	0.514899
7	1	2	1	4	4	0	3	3	0	0	0	1	1	3	0	1	1	1	1	1	1	1	0	0	0	0	0	1	0	0	1	1	0	0	0	0	1	2	2	0.514899
7	1	0	0	0																																0	1	2	3	0.514899
7	1	2	1	0																																0	1	2	3	0.514899
7	1	1	0	1	1	0	0	0	0	0	0	0	0	0	0	0	0	0	0	0	0	0	0	0	0	0	0	0	0	0	0	0	0	0	0	0	1	2	3	0.514899
7	1	1	0	1	2	0	2	1	0	0	0	1	0	1	0	0	0	0	1	1	1	1	0	0	0	0	0	0	0	0	0	0	0	0	1	0	1	1	3	0.514899
7	1	1	0	3	4	2	2	2	2	2	1	3	3	3	1	0	0	0	1	1	1	1	0	1	0	0	0	0	0	0	0	0	0	0	1	0	1	2	3	0.514899
7	1	2	1	0																																0	1	2	2	0.514899
7	1	0	0	0																																1	1	2	3	0.75822
7	1	1	0	0																																1	1	2	2	0.75822
7	1	2	1	0																																1	1	2	2	0.75822
7	1	2	1	0																																1	2	2	2	2.0347
7	1	1	0	0																																0	0	2	4	0.597429
7	1	1	0	0																																1	1	2	3	0.75822
7	1	2	1	0																																1	2	2	2	2.0347
7	1	2	1	0																																0	0	1	2	0.597429
7	1	2	1	1	2	0	1	0	2	0	0	0	0	1	0	0	0	0	1	1	1	1	0	0	0	0	0	0	0	1	0	0	0	0	0	0	0	2	2	0.597429
7	1	1	0	1	2	0	1	1	0	0	0	0	2	1	0	0	1	0	0	1	1	1	0	0	0	0	0	1	0	0	1	0	0	0	0	0	1	2	2	0.514899
7	1	0	0	2	3	1	1	1	1	1	1	1	2	2	0	0	0	0	1	1	0	1	0	0	0	0	0	0	0	0	0	0	0	0	1	0	0	2	2	0.597429
7	1	1	0	3	3	1	2	2	2	1	1	2	1	1	0	0	0	0	0	1	0	1	0	0	0	0	0	0	0	0	1	0	0	0	0	1	1	1	2	0.75822
7	1	1	0	4	4	1	3	3	0	2	2	2	3	3	0	1	1	0	1	1	1	1	1	0	0	0	0	0	0	1	1	1	1	0	0	1	1	2	2	0.75822
7	1	3	1	0																																0	0	2	4	0.597429
7	1	3	1	0																																0	1	2	2	0.514899
7	1	0	0	1	1	0	0	0	0	0	0	0	0	0	0	0	0	0	0	0	0	0	0	0	0	0	0	0	0	0	0	0	0	0	0	1	0	2	2	1.16791
7	1	0	0	1	1	0	0	0	0	0	0	0	0	0	0	0	0	0	0	0	0	0	0	0	0	0	0	0	0	0	0	0	0	0	0	0	2	2	4	1.31777
7	1	3	1	2	3	2	2	2	2	1	1	1	1	2	1	0	0	0	0	0	1	1	1	1	0	0	0	0	0	0	0	0	0	0	1	0	2	2	4	1.31777
7	1	2	1	3	3	0	3	2	1	1	1	3	0	0	0	0	0	0	1	1	1	1	0	0	0	0	0	1	0	0	1	1	0	0	0	0	0	2	2	0.597429
7	1	1	0	4	4	1	2	3	3	1	1	1	3	3	0	0	0	0	1	1	0	1	0	0	0	0	0	0	0	0	0	1	0	0	0	0	2	1	2	1.31777
7	1	1	0	0																																0	0	2	2	0.597429
7	1	2	1	0																																0	1	2	2	0.514899
7	1	2	1	0																																0	2	2	3	1.31777
7	1	3	1	0																																1	3	2	4	4.28436
7	1	1	0	1	2	2	2	2	1	0	0	1	1	1	0	0	0	0	1	1	1	1	1	0	0	0	0	1	0	0	1	1	1	0	0	1	2	2	3	2.0347
7	1	1	0	2	3	2	3	3	2	2	2	3	3	0	0	0	0	0	0	0	0	0	0	0	0	0	0	0	0	0	0	0	0	0	0	0	1	2	3	0.514899
7	1	1	0	4	4	1	3	3	2	1	1	2	2	3	1	0	0	0	0	0	1	1	0	0	0	0	0	0	0	0	1	1	0	0	0	1	1	2	2	0.75822
7	1	2	1	0																																1	1	2	2	0.75822
7	1	0	0	0																																1	1	2	3	0.75822
7	1	2	1	1	2	0	2	2	0	0	2	0	0	1	0	0	0	0	1	1	1	1	0	0	0	0	0	0	0	0	1	0	1	0	0	1	2	2	3	2.0347
7	1	1	0	4	3	1	3	2	2	2	1	2	2	3	0	0	1	1	1	1	1	1	0	0	0	0	0	1	0	0	0	1	1	0	0	1	1	2	2	0.75822
7	1	2	1	0																																1	1	2	4	0.75822
7	1	1	0	0																																1	1	2	4	0.75822
7	1	1	0	1	1	0	0	0	0	0	0	0	0	0	0	0	0	0	0	0	0	0	0	0	0	0	0	0	0	0	0	0	0	0	0	1	2	2	3	2.0347
7	1	1	0	2	2	2	2	2	1	1	0	1	1	1	0	0	0	0	0	1	1	1	0	0	0	0	0	1	0	0	0	1	0	0	0	0	2	2	2	1.31777
7	1	1	0	0																																0	1	2	4	0.514899
7	1	2	1	0																																0	2	1	2	1.31777
7	1	1	0	4	2	1	2	1	1	1	1	1	1	1	1	0	0	0	0	0	0	1	0	0	0	0	0	0	0	0	0	1	0	0	0	1	2	1	2	2.0347
7	1	2	1	1	2	2	1	2	2	2	2	3	1	2	1	1	1	0	0	0	1	1	1	0	0	0	0	0	0	1	1	1	0	0	1	1	0	2	3	1.16791
7	1	2	1	1	3	1	1	1	1	1	1	1	1	3	0	1	0	0	1	1	1	1	0	0	0	0	0	0	0	1	1	1	1	1	1	1	2	1	3	2.0347
8	1	0	0	0																																0	0	2	2	0.597429
8	1	1	0	0																																1	0	2	2	1.16791
8	1	2	1	0																																1	1	2	2	0.75822
8	1	2	1	1	3	0	0	0	0	0	0	0	0	1	0	0	0	0	0	1	0	1	0	0	0	0	0	0	0	0	0	0	0	0	1	0	0	2	2	0.597429
8	1	2	1	2	3	1	2	3	2	1	1	1	1	3	1	0	0	0	0	0	1	1	1	0	0	0	0	1	0	0	0	0	0	0	1	0	1	1	2	0.514899
8	1	3	1	0																																0	1	2	4	0.514899
8	1	2	1	0																																1	1	2	3	0.75822
8	1	1	0	0																																1	1	2	4	0.75822
8	1	1	0	3	4	2	2	2	2	1	1	1	1	1	0	0	0	0	1	1	1	1	0	0	0	0	0	0	0	0	0	1	0	0	0	0	0	2	3	0.597429
8	1	0	0	4	4	0	2	2	0	0	0	0	0	3	0	0	1	0	1	1	1	1	0	0	0	0	0	0	1	0	1	1	1	0	1	0	2	1	2	1.31777
8	1	0	0	0																																1	0	2	2	1.16791
8	1	0	0	0																																0	2	2	2	1.31777
8	1	2	1	0																																0	2	1	2	1.31777
8	1	2	1	0																																0	0	2	2	0.597429
8	1	2	1	0																																0	1	2	2	0.514899
8	1	1	0	0																																1	1	2	3	0.75822
8	1	0	0	0																																0	2	2	2	1.31777
8	1	2	1	0																																1	2	2	3	2.0347
8	1	1	0	0																																1	0	1	2	1.16791
8	1	2	1	0																																0	1	1	3	0.514899
8	1	2	1	1	1	0	0	0	0	0	0	0	0	0	0	0	0	0	0	0	0	0	0	0	0	0	0	0	0	0	0	0	0	0	0	1	0	2	3	1.16791
8	1	2	1	1	2	1	1	1	1	0	0	0	1	1	0	0	0	0	0	1	1	1	0	0	0	0	0	0	0	0	0	1	0	0	1	1	2	2	2	2.0347
8	1	2	1	1	2	1	1	1	0	0	0	0	1	2	0	0	0	0	1	1	1	1	0	0	0	0	0	0	0	0	0	1	0	0	0	1	1	1	2	0.75822
8	1	2	1	2	3	0	2	2	1	2	1	1	1	2	1	0	0	0	0	0	1	1	1	0	0	0	0	1	0	0	0	0	0	0	1	1	0	2	3	1.16791
8	1	1	0	2	2	2	2	2	2	2	2	0	2	0	1	0	0	0	0	0	0	1	0	0	0	0	0	0	0	0	1	0	0	0	0	1	2	2	3	2.0347
8	1	3	1	3	2	1	2	2	1	0	1	0	0	2	0	1	0	0	0	0	1	0	0	0	0	0	0	0	0	0	0	1	0	0	0	0	1	2	2	0.514899
8	1	3	1	3	3	0	0	0	0	0	0	0	0	0	0	0	0	0	0	0	0	0	0	0	0	0	0	0	0	0	0	0	0	0	0	0	2	1	2	1.31777
8	1	1	0	4	4	3	3	3	3	3	3	3	3	1	0	0	0	0	0	1	1	1	0	0	0	0	0	1	0	0	0	0	0	0	1	0	1	2	4	0.514899
8	1	1	0	0																																0	1	2	3	0.514899
8	1	2	1	0																																0	1	2	4	0.514899
8	1	1	0	0																																1	2	2	3	2.0347
8	1	2	1	0																																0	0	1	4	0.597429
8	1	3	1	0																																0	0	1	2	0.597429
8	1	1	0	0																																0	1	1	2	0.514899
8	1	2	1	3	3	2	1	3	1	2	0	1	2	0	0	0	0	0	1	0	1	1	0	0	0	0	0	0	0	0	0	0	0	0	1	0	1	2	3	0.514899
8	1	3	1	0																																1	1	2	2	0.75822
8	1	2	1	0																																1	1	1	2	0.75822
8	1	2	1	0																																0	1	2	3	0.514899
8	1	1	0	0																																1	2	2	4	2.0347
8	1	1	0	0																																0	0	2	3	0.597429
8	1	2	1	0																																0	0	2	4	0.597429
8	1	1	0	0																																1	0	2	3	1.16791
8	1	2	1	0																																1	1	2	3	0.75822
8	1	1	0	0																																0	1	2	2	0.514899
8	1	2	1	0																																0	1	2	2	0.514899
8	1	1	0	0																																0	2	2	2	1.31777
8	1	1	0	0																																1	2	2	2	2.0347
8	1	0	0	1	0	0	0	0	0	0	0	0	0	0	0	0	0	0	0	0	0	0	0	0	0	0	0	0	0	0	0	0	0	0	0	0	2	2	3	1.31777
8	1	2	1	1	2	0	0	1	0	0	0	0	1	1	0	0	0	0	1	1	0	1	0	0	0	0	0	0	0	0	0	0	0	0	1	0	2	2	3	1.31777
8	1	1	0	1	2	1	1	1	1	1	1	0	1	1	0	1	0	0	1	1	1	1	0	0	0	0	0	0	0	0	0	0	0	0	1	0	1	1	3	0.514899
8	1	1	0	2	3	1	1	2	2	1	1	1	0	2	0	0	1	0	1	1	1	1	0	0	0	0	0	0	0	0	0	1	1	0	0	0	1	2	2	0.514899
8	1	2	1	2	2	0	2	1	3	1	0	0	1	3	1	1	1	1	1	1	1	1	1	0	0	0	0	0	0	1	1	1	1	0	1	0	1	2	2	0.514899
8	1	2	1	4	4	1	2	2	1	1	1	1	1	3	1	0	0	0	0	0	1	1	0	0	0	0	0	0	0	0	1	1	0	0	1	0	0	2	2	0.597429
8	1	1	0	0																																0	1	2	2	0.514899
8	1	2	1	0																																0	1	2	3	0.514899
8	1	1	0	0																																1	1	2	3	0.75822
8	1	1	0	0																																1	2	1	4	2.0347
8	1	2	1	0																																0	2	1	2	1.31777
8	1	2	1	0																																0	0	2	2	0.597429
8	1	0	0	0																																0	2	1	4	1.31777
8	1	3	1	1	1	0	0	0	0	0	0	0	0	0	0	0	0	0	0	0	0	0	0	0	0	0	0	0	0	0	0	0	0	0	0	0	1	2	4	0.514899
8	1	0	0	1	1	0	0	0	0	0	0	0	0	3	1	0	0	1	1	1	0	1	0	0	0	0	0	0	0	1	0	0	0	0	1	0	1	2	3	0.514899
8	1	1	0	1	0	0	1	0	1	1	0	0	0	1	0	0	0	0	1	1	0	1	0	0	0	0	0	0	0	0	0	1	0	0	0	1	1	1	3	0.75822
8	1	1	0	3	3	1	3	2	1	1	2	3	1	2	0	0	0	0	1	1	1	1	0	0	0	0	0	1	0	0	0	1	0	0	0	0	1	2	2	0.514899
8	1	0	0	0																																0	1	2	2	0.514899
8	1	1	0	1	1	0	0	1	0	0	0	0	0	1	0	0	0	0	1	0	0	1	0	0	0	0	0	0	0	0	0	1	0	0	0	0	2	2	3	1.31777
8	1	2	1	2	2	1	2	1	2	1	1	1	1	1	0	0	0	0	1	1	1	1	0	0	0	0	0	0	0	0	0	0	0	0	1	0	1	2	3	0.514899
8	1	1	0	3	3	3	3	3	2	2	2	2	1	2	0	0	1	0	1	1	1	1	0	0	0	0	0	0	0	0	0	1	1	0	0	1	1	2	2	0.75822
8	1	2	1	0																																0	1	2	3	0.514899
8	1	1	0	0																																0	2	2	3	1.31777
8	1	2	1	1	2	0	1	1	0	0	0	0	0	1	0	0	0	0	0	1	1	1	0	0	0	0	0	0	0	0	1	1	0	0	0	0	0	2	2	0.597429
8	1	2	1	1	4	3	3	3	2	2	2	2	2	3	1	0	0	0	0	0	1	1	1	0	0	0	0	0	0	0	0	0	0	0	1	0	0	2	2	0.597429
8	1	2	1	1	3	1	1	1	2	1	1	1	0	2	0	0	0	0	1	1	1	1	0	0	0	0	0	0	0	0	0	0	0	0	1	0	0	2	2	0.597429
8	1	2	1	1	0	0	0	0	0	0	0	0	0	0	0	0	0	0	0	0	0	0	0	0	0	0	0	0	0	0	0	0	0	0	0	1	1	2	2	0.75822
8	1	2	1	1	1	0	0	0	0	0	0	0	0	1	0	0	0	0	1	1	1	1	0	0	0	0	0	0	0	0	1	0	0	0	0	0	2	2	4	1.31777
8	1	2	1	2	2	0	1	2	0	0	0	0	1	1	0	0	0	0	1	0	0	1	0	0	0	0	0	0	0	0	0	1	0	0	0	0	2	2	2	1.31777
8	1	2	1	2	2	0	1	1	0	0	0	1	0	1	0	0	0	0	0	1	0	0	0	0	0	0	0	0	0	0	0	1	0	0	0	0	1	1	2	0.514899
8	1	2	1	0																																0	1	2	2	0.514899
8	1	1	0	1	3	2	2	3	1	1	1	2	2	1	0	1	0	0	1	1	1	1	0	0	0	0	0	0	0	0	1	1	0	0	0	1	1	2	3	0.75822
8	1	2	1	1	1	0	0	0	0	0	0	0	0	0	0	0	0	0	0	0	0	0	0	0	0	0	0	0	0	0	0	0	0	0	0	0	2	1	3	1.31777
8	1	1	0	1	3	1	1	0	0	1	0	0	2	1	0	0	0	1	0	1	0	1	0	0	0	0	0	0	0	0	0	0	0	0	1	0	1	2	3	0.514899
8	1	1	0	2	2	1	2	1	2	1	1	1	0	0	0	0	0	0	0	0	0	0	0	0	0	0	0	0	0	0	0	0	0	0	0	0	1	2	3	0.514899
8	1	2	1	0																																0	1	2	3	0.514899
8	1	1	0	0																																0	0	2	3	0.597429
8	1	2	1	2	2	1	2	2	1	1	0	1	1	2	1	0	0	0	0	0	1	1	1	0	0	0	0	0	0	0	0	0	0	0	1	0	0	1	2	0.597429
9	1	0	0	0																																0	0	1	2	0.597429
9	1	2	1	1	1	0	0	0	0	0	0	0	0	0	0	0	0	0	0	0	0	0	0	0	0	0	0	0	0	0	0	0	0	0	0	0	2	2	2	1.31777
9	1	2	1	0																																0	2	2	4	1.31777
9	1	1	0	3	0	0	0	0	0	0	0	0	0	0	0	0	0	0	0	0	0	0	0	0	0	0	0	0	0	0	0	0	0	0	0	0	1	1	2	0.514899
9	1	1	0	0																																0	0	2	2	0.597429
9	1	3	1	1	2	0	0	0	0	0	0	0	0	0	0	0	0	0	0	0	0	0	0	0	0	0	0	0	0	0	0	0	0	0	0	0	0	2	4	0.597429
9	1	2	1	0																																0	1	2	2	0.514899
9	1	1	0	1	1	0	0	0	0	0	0	0	0	0	0	0	0	0	0	0	0	0	0	0	0	0	0	0	0	0	0	0	0	0	0	0	0	1	3	0.597429
9	1	0	0	2	1	0	0	0	0	0	0	0	0	0	0	0	0	0	0	0	0	0	0	0	0	0	0	0	0	0	0	0	0	0	0	1	0	2	4	1.16791
9	1	2	1	1	2	0	0	0	1	0	0	0	0	1	0	0	0	0	1	1	0	1	0	0	0	0	0	0	0	1	0	0	0	0	0	1	0	2	2	1.16791
9	1	1	0	0																																0	1	2	2	0.514899
9	1	2	1	0																																0	1	2	3	0.514899
9	1	3	1	0																																1	3	2	2	4.28436
9	1	2	1	0																																1	0	2	2	1.16791
9	1	1	0	0																																0	1	2	2	0.514899
9	1	2	1	0																																0	2	2	4	1.31777
9	1	2	1	0																																1	2	2	3	2.0347
9	1	1	0	2	3	1	3	0	0	0	0	3	1	3	0	1	0	0	1	1	1	1	0	0	0	0	0	0	0	0	1	1	0	0	0	0	1	2	3	0.514899
9	1	2	1	2	2	2	2	2	2	2	0	1	1	3	0	1	1	0	1	1	1	1	0	0	0	0	0	1	0	0	0	1	0	0	0	0	1	1	2	0.514899
9	1	1	0	2	2	0	1	1	0	0	0	1	1	1	0	0	0	0	0	1	1	1	0	0	0	0	0	0	0	0	0	1	0	0	0	0	2	1	3	1.31777
9	1	1	0	2	2	0	0	1	0	0	0	0	0	1	0	0	0	0	1	1	0	1	0	0	0	0	0	0	0	0	0	1	0	0	0	0	1	2	3	0.514899
9	1	2	1	0																																0	1	2	2	0.514899
9	1	1	0	2	4	1	2	3	1	3	2	1	1	3	1	0	0	0	0	0	0	1	0	0	0	0	0	1	0	0	0	1	0	0	0	1	2	2	2	2.0347
9	1	2	1	2	2	0	0	0	0	0	0	0	0	1	0	0	0	0	0	1	0	1	0	0	0	0	0	0	0	0	0	1	0	0	0	0	1	1	3	0.514899
9	1	0	0	3	1	0	0	0	0	0	0	0	0	0	0	0	0	0	0	0	0	0	0	0	0	0	0	0	0	0	0	0	0	0	0	0	2	2	4	1.31777
9	1	1	0	0																																1	2	2	3	2.0347
9	1	1	0	0																																0	2	2	3	1.31777
9	1	2	1	0																																0	1	2	2	0.514899
10	1	1	0	0																																0	2	2	3	1.31777
10	1	3	1	1	0	0	0	0	0	0	0	0	0	0	0	0	0	0	0	0	0	0	0	0	0	0	0	0	0	0	0	0	0	0	0	1	2	2	4	2.0347
10	1	2	1	0																																0	1	2	2	0.514899
10	1	0	0	0																																0	0	2	3	0.597429
10	1	0	0	0																																1	1	2	2	0.75822
10	1	3	1	0																																0	0	1	4	0.597429
10	1	1	0	1	0	0	0	0	0	0	0	0	0	0	0	0	0	0	0	0	0	0	0	0	0	0	0	0	0	0	0	0	0	0	0	0	1	2	3	0.514899
10	1	0	0	0																																0	1	2	3	0.514899
10	1	1	0	0																																0	0	1	2	0.597429
10	1	1	0	0																																0	1	1	2	0.514899
10	1	1	0	0																																0	0	2	4	0.597429
10	1	2	1	0																																1	1	2	2	0.75822
10	1	0	0	0																																0	0	2	3	0.597429
10	1	2	1	1	1	0	0	0	0	0	0	0	0	0	0	0	0	0	0	0	0	0	0	0	0	0	0	0	0	0	0	0	0	0	0	0	2	1	3	1.31777
10	1	2	1	4	3	2	2	3	2	2	2	3	2	3	1	0	0	0	0	0	1	0	0	0	0	0	0	0	0	0	0	0	0	0	1	0	1	2	3	0.514899
10	1	1	0	0																																0	0	2	4	0.597429
10	1	2	1	0																																0	2	1	3	1.31777
10	1	0	0	1	1	0	0	0	0	0	0	0	0	0	0	0	0	0	0	0	0	0	0	0	0	0	0	0	0	0	0	0	0	0	0	1	2	2	4	2.0347
10	1	1	0	0																																0	0	2	4	0.597429
10	1	1	0	0																																1	1	1	4	0.75822
10	1	2	1	0																																0	1	2	2	0.514899
10	1	2	1	0																																0	2	2	4	1.31777
10	1	2	1	0																																0	1	1	3	0.514899
10	1	2	1	3	2	0	0	0	0	0	0	0	0	0	0	0	0	0	0	0	0	0	0	0	0	0	0	0	0	0	0	0	0	0	0	1	0	2	2	1.16791
10	1	2	1	0																																0	1	2	2	0.514899
1	0	1	0	4	4	3	3	3	2	2	3	3	2	3	1	1	1	1	1	1	1	1	0	0	0	0	0	1	0	0	1	1	0	0	1	0	1	1	1	0.514899
1	0	2	1	0																																0	0	2	1	0.597429
1	0	0	0	4	2	0	0	0	0	0	0	0	0	0	0	0	0	0	0	0	0	0	0	0	0	0	0	0	0	0	0	0	0	0	1	1	1	1	1	0.75822
1	0	0	0	4	4	3	3	3	3	3	3	3	1	3	1	1	1	1	1	1	1	1	0	0	0	0	0	1	0	1	1	1	1	0	1	1	0	2	1	1.16791
1	0	0	0	4	4	3	3	3	3	3	3	3	3	3	1	1	0	0	1	1	1	1	1	0	0	0	1	1	0	1	1	1	1	0	1	0	3	0	1	4.88382
2	0	1	0	4	4	3	3	3	3	3	3	3	3	3	1	0	0	0	0	0	1	1	1	1	0	0	0	0	0	1	1	1	1	1	0	1	1	2	1	0.75822
2	0	1	0	4	4	3	3	3	3	0	0	0	0	3	0	1	0	0	1	1	1	1	0	1	0	0	0	1	0	1	1	1	0	0	0	0	1	1	1	0.514899
2	0	1	0	3	4	3	3	3	3	3	2	3	3	3	0	0	1	0	1	0	1	1	1	0	0	0	0	0	0	1	1	1	0	0	0	0	1	1	1	0.514899
3	0	2	1	0																																1	0	1	1	1.16791
3	0	0	0	4	3	2	2	3	0	1	1	2	2	3	0	0	0	1	1	1	1	1	1	0	0	0	0	1	0	0	0	1	0	0	0	0	1	1	1	0.514899
3	0	0	0	1	4	3	0	3	3	0	0	0	3	3	0	0	0	0	1	1	1	1	0	0	0	0	0	1	0	0	0	0	0	0	1	0	1	1	1	0.514899
3	0	0	0	4	4	3	3	3	3	3	3	3	2	3	0	1	0	0	1	1	1	1	0	0	0	0	0	1	0	0	0	1	0	0	0	1	1	2	1	0.75822
3	0	0	0	4	4	3	3	3	3	3	3	3	3	3	1	1	1	1	1	1	1	1	1	1	0	0	1	1	0	1	1	1	1	0	1	1	0	2	1	1.16791
3	0	0	0	1	2	2	3	3	2	3	2	3	1	1	0	1	0	0	1	1	1	1	0	0	0	0	0	0	0	0	1	1	0	0	0	1	1	2	1	0.75822
3	0	0	0	1	4	1	3	3	2	1	1	3	1	3	1	0	0	0	0	0	1	1	0	1	0	0	1	1	0	0	0	0	0	0	1	0	1	1	1	0.514899
3	0	1	0	2	3	2	2	2	3	2	2	2	2	1	0	0	0	0	1	1	1	1	0	1	0	0	0	0	0	0	0	1	0	0	1	0	1	2	1	0.514899
3	0	1	0	3	4	2	3	3	2	2	1	3	3	1	1	0	0	0	1	1	1	1	1	1	0	0	0	1	0	1	1	1	0	0	0	1	0	2	1	1.16791
3	0	2	1	2	4	3	3	3	3	3	3	3	3	3	1	1	1	1	1	1	1	1	1	0	0	0	0	0	0	1	1	1	1	1	1	0	1	1	1	0.514899
3	0	2	1	0																																0	1	2	1	0.514899
4	0	0	0	1	1	0	0	0	0	0	0	0	0	0	0	0	0	0	0	0	0	0	0	0	0	0	0	0	0	0	0	0	0	0	0	1	2	2	1	2.0347
4	0	0	0	1	3	1	1	2	1	1	1	0	2	3	1	0	0	0	1	1	1	1	0	0	0	0	0	0	0	0	0	0	0	0	1	0	1	1	1	0.514899
4	0	2	1	3	4	1	3	3	1	3	1	3	1	3	0	1	0	0	1	1	1	1	0	0	0	0	0	0	0	0	1	1	0	0	0	1	1	2	1	0.75822
4	0	0	0	4	3	2	2	2	2	1	1	0	0	3	1	0	0	0	1	1	1	1	0	0	0	0	0	0	0	0	1	1	0	0	0	1	2	0	1	2.0347
4	0	3	1	0																																0	1	1	1	0.514899
4	0	1	0	1	2	0	1	2	0	0	0	0	0	0	0	0	0	0	0	0	1	1	0	0	0	0	0	0	0	0	0	1	1	0	0	0	1	2	1	0.514899
4	0	1	0	3	3	1	1	2	2	1	1	1	2	2	0	1	0	0	0	1	1	1	1	0	0	0	0	1	0	0	1	1	0	1	1	0	2	2	1	1.31777
4	0	1	0	4	4	3	3	3	3	1	1	3	2	3	0	0	1	0	1	1	1	1	0	0	0	0	0	1	0	0	0	1	0	0	0	0	1	1	1	0.514899
4	0	2	1	1	4	2	0	0	2	2	1	2	3	1	1	0	0	0	0	0	1	1	0	0	0	0	0	0	0	0	0	0	0	0	1	0	0	1	1	0.597429
4	0	1	0	4	3	1	1	2	1	0	0	3	3	2	1	0	0	0	0	0	1	1	0	0	0	0	0	1	0	1	1	1	1	0	0	0	2	1	1	1.31777
4	0	2	1	0																																1	2	1	1	2.0347
4	0	0	0	4	4	3	3	3	3	0	3	3	3	3	1	1	1	1	1	1	1	1	1	1	0	1	1	1	0	0	0	1	1	1	0	1	2	0	1	2.0347
4	0	1	0	4	4	3	3	3	1	2	2	2	3	3	1	0	0	0	0	0	1	1	0	1	0	0	0	1	0	0	0	1	1	0	1	0	3	0	1	4.88382
4	0	1	0	4	3	2	2	2	3	2	1	1	2	3	0	0	0	0	1	1	1	1	0	0	0	0	0	0	0	0	0	1	1	0	1	0	1	2	1	0.514899
4	0	2	1	0																																0	1	2	1	0.514899
4	0	0	0	2	2	2	1	2	0	2	0	0	0	1	0	0	0	0	1	1	0	1	0	0	0	0	0	1	0	0	0	1	1	0	0	0	0	1	1	0.597429
4	0	1	0	2	3	2	2	3	2	3	1	2	2	3	0	0	1	0	1	1	1	1	1	0	0	0	1	0	0	0	1	1	1	0	0	0	1	1	1	0.514899
4	0	0	0	4	4	3	3	3	2	2	1	2	3	1	1	0	0	0	0	0	1	1	0	1	0	0	0	1	0	0	0	1	0	0	0	0	2	2	1	1.31777
5	0	1	0	1	2	1	1	1	1	1	1	1	0	3	1	0	0	0	0	0	1	1	0	0	0	0	0	0	0	0	0	0	0	0	1	1	1	2	1	0.75822
5	0	1	0	1	2	1	2	2	1	0	0	0	1	1	0	0	0	0	1	1	0	1	0	0	0	0	0	0	0	0	0	1	0	0	1	0	2	2	1	1.31777
5	0	1	0	2	3	3	3	3	2	2	2	2	2	2	1	0	0	0	1	1	1	1	1	0	0	0	0	1	0	0	1	1	0	0	1	0	1	1	1	0.514899
5	0	0	0	0																																1	0	2	1	1.16791
5	0	1	0	0																																0	2	2	1	1.31777
5	0	0	0	0																																0	1	1	1	0.514899
5	0	1	0	3	3	2	1	2	1	1	0	1	2	3	0	0	1	1	1	1	1	1	0	0	0	0	0	1	0	1	1	1	1	0	0	0	0	2	1	0.597429
5	0	0	0	0																																0	0	2	1	0.597429
5	0	1	0	3	3	3	3	3	2	2	2	2	3	3	1	0	0	0	0	0	1	1	0	1	0	0	0	0	0	0	0	0	0	0	1	1	1	2	1	0.75822
5	0	1	0	4	4	3	3	0	2	3	2	3	2	3	1	0	0	0	0	0	1	1	1	0	0	0	0	1	0	0	1	1	0	0	0	0	1	2	1	0.514899
5	0	1	0	3	3	0	1	2	0	0	0	1	0	3	0	0	0	0	1	1	1	1	0	0	0	0	0	0	0	0	1	1	0	0	0	0	2	1	1	1.31777
5	0	2	1	0																																0	0	2	1	0.597429
5	0	2	1	0																																0	2	1	1	1.31777
5	0	2	1	3	4	0	3	2	1	2	1	2	1	3	1	1	1	1	1	1	0	0	0	0	0	0	0	0	0	0	1	1	0	0	0	0	1	2	1	0.514899
5	0	1	0	3	4	3	3	3	3	3	3	3	2	3	1	0	0	0	0	0	1	1	0	1	0	0	0	1	0	0	0	1	1	0	0	0	2	2	1	1.31777
5	0	1	0	1	3	0	1	1	2	1	0	1	1	2	0	0	0	0	1	1	1	1	0	0	0	0	0	0	0	0	0	0	0	0	1	0	1	1	1	0.514899
5	0	2	1	0																																0	0	2	1	0.597429
5	0	2	1	0																																0	1	2	1	0.514899
5	0	1	0	0																																0	1	2	1	0.514899
5	0	1	0	1	2	2	1	2	1	1	0	2	1	2	0	0	0	0	1	0	1	1	0	0	0	0	0	0	0	0	0	0	0	0	1	0	1	1	1	0.514899
5	0	2	1	1	2	1	2	2	1	1	1	1	1	3	1	0	0	0	0	0	0	1	0	0	0	0	0	0	0	0	0	1	0	0	0	0	1	1	1	0.514899
5	0	0	0	3	4	2	3	3	3	3	2	3	2	3	1	0	0	0	0	0	1	1	0	0	0	0	0	1	0	0	0	0	0	0	1	0	1	2	1	0.514899
5	0	1	0	4	3	1	3	3	2	2	1	3	1	2	0	0	1	0	1	1	0	1	0	1	0	0	0	1	0	0	0	1	0	0	0	0	1	2	1	0.514899
5	0	1	0	4	4	3	0	0	0	0	0	3	0	3	1	0	0	0	0	0	1	1	0	0	0	0	0	0	0	0	0	1	0	0	0	0	1	1	1	0.514899
5	0	1	0	3	3	2	1	0	1	1	1	0	2	1	0	0	0	0	1	1	1	1	0	0	0	0	0	0	0	0	0	1	0	0	1	0	1	2	1	0.514899
5	0	1	0	3	4	2	3	3	3	1	2	2	3	2	0	1	0	0	1	1	1	1	0	0	0	0	0	0	0	0	0	0	0	0	1	0	3	1	1	4.88382
5	0	1	0	4	4	3	3	3	3	1	1	3	3	3	0	1	1	0	1	1	1	1	1	0	0	0	0	0	0	0	0	1	1	0	0	0	2	1	1	1.31777
5	0	1	0	3	3	1	2	2	2	1	0	2	2	0	0	0	1	0	1	1	1	1	0	0	0	0	0	0	0	0	0	1	1	0	0	1	0	2	1	1.16791
5	0	2	1	3	3	2	3	3	3	2	2	3	1	0	0	0	0	0	1	1	1	1	0	0	0	0	0	1	0	0	0	1	0	0	0	0	1	2	1	0.514899
5	0	0	0	1	1	0	1	0	0	0	0	0	0	0	0	0	0	0	0	0	0	1	0	0	0	0	0	0	0	0	0	0	0	0	1	0	2	0	1	1.31777
5	0	2	1	4	4	2	3	3	1	1	2	3	2	1	0	1	1	0	0	1	1	0	0	0	0	0	0	1	0	0	0	1	1	0	0	0	1	2	1	0.514899
5	0	2	1	0																																0	2	2	1	1.31777
5	0	0	0	2	0	0	0	0	0	0	0	0	0	0	0	0	0	0	0	0	0	0	0	0	0	0	0	0	0	0	0	0	0	0	0	0	1	1	1	0.514899
5	0	1	0	4	3	2	3	3	2	2	1	1	1	2	0	0	0	0	1	1	1	1	0	0	0	0	0	0	0	0	0	1	1	0	0	0	1	1	1	0.514899
5	0	1	0	2	3	1	2	3	2	2	2	2	1	3	0	0	1	0	1	1	0	1	0	0	0	0	0	1	0	0	0	1	0	0	0	1	1	1	1	0.75822
6	1	1	0	0																																0	1	1	1	0.514899
6	1	1	0	1	2	1	1	1	0	0	0	1	0	1	0	0	0	0	1	1	1	1	0	0	0	0	0	0	0	0	0	0	0	0	1	0	0	2	1	0.597429
6	1	1	0	4	4	2	3	3	3	2	2	3	2	2	0	0	1	1	1	1	1	1	0	0	0	0	0	0	0	1	0	1	0	0	1	0	1	1	1	0.514899
6	1	2	1	0																																0	1	2	1	0.514899
6	1	3	1	1	0	0	0	0	0	0	0	0	0	0	0	0	0	0	0	0	0	0	0	0	0	0	0	0	0	0	0	0	0	0	0	0	1	2	1	0.514899
6	1	1	0	1	2	0	0	0	1	0	0	0	1	1	0	0	0	0	1	1	1	1	0	0	0	0	0	0	0	0	0	1	0	0	0	0	2	1	1	1.31777
6	1	1	0	1	2	1	1	1	1	1	0	0	1	2	0	0	0	0	1	1	1	1	0	0	0	0	0	0	0	0	0	0	0	0	1	1	2	1	1	2.0347
6	1	0	0	2	2	0	0	0	0	0	0	0	0	0	0	0	0	0	0	0	0	0	0	0	0	0	0	0	0	1	1	0	0	0	1	0	3	2	1	4.88382
6	1	1	0	3	3	1	2	2	2	1	1	3	0	2	1	1	1	1	1	1	1	1	1	0	0	0	0	1	0	0	0	1	0	0	0	0	0	2	1	0.597429
6	1	2	1	3	3	0	0	0	0	0	0	0	0	0	1	0	0	0	0	0	0	1	0	0	0	0	0	0	0	0	1	1	0	0	0	0	1	0	1	0.514899
6	1	1	0	4	4	2	3	3	3	2	2	3	1	2	1	0	0	0	0	0	1	0	0	0	0	0	0	0	0	0	0	1	0	0	0	1	1	2	1	0.75822
6	1	1	0	4	4	2	3	3	2	2	2	2	3	2	1	0	0	0	0	0	1	1	0	0	0	0	0	0	0	0	0	1	0	0	0	1	2	1	1	2.0347
6	1	0	0	0																																0	0	2	1	0.597429
6	1	1	0	2	2	1	3	3	1	1	1	3	1	1	0	0	1	0	0	0	1	1	1	0	0	0	0	1	0	0	0	1	0	0	0	0	1	2	1	0.514899
6	1	1	0	2	2	1	0	1	1	0	1	1	1	1	1	0	0	0	0	0	1	1	1	0	0	0	0	0	0	0	0	1	0	0	1	0	2	2	1	1.31777
6	1	1	0	3	4	1	3	3	0	1	1	2	1	1	0	0	0	0	1	1	0	1	0	0	0	0	0	0	0	0	0	0	0	0	1	0	2	1	1	1.31777
6	1	0	0	0																																0	2	1	1	1.31777
6	1	1	0	0																																0	1	2	1	0.514899
6	1	2	1	2	2	3	3	3	2	3	3	3	2	1	1	0	0	0	0	0	1	1	0	0	0	0	0	1	0	0	1	1	1	0	0	0	2	1	1	1.31777
6	1	2	1	2	2	2	2	1	2	1	2	1	2	2	0	0	0	1	1	1	1	1	1	0	0	0	0	1	0	0	0	0	0	0	1	0	1	2	1	0.514899
6	1	1	0	3	3	1	3	2	1	0	0	0	0	2	1	1	1	0	1	1	0	1	1	0	0	0	0	1	0	0	0	1	1	0	0	1	3	2	1	4.28436
6	1	2	1	4	3	2	1	2	2	2	2	2	2	1	0	0	1	0	0	0	1	1	1	0	0	0	0	1	0	0	0	0	0	0	1	0	2	1	1	1.31777
6	1	0	0	0																																0	1	1	1	0.514899
6	1	0	0	1	2	1	1	1	1	1	1	0	2	1	0	0	0	1	1	1	0	1	0	0	0	0	0	0	0	0	0	0	0	0	1	0	2	1	1	1.31777
6	1	0	0	3	3	1	3	3	2	3	2	3	2	3	0	0	1	1	1	1	1	1	0	0	0	0	0	1	0	0	1	1	0	0	0	1	0	2	1	1.16791
6	1	2	1	4	4	2	3	3	3	3	2	3	3	3	1	0	0	0	0	0	1	1	0	0	0	0	0	1	0	1	1	1	0	0	1	0	1	2	1	0.514899
6	1	1	0	4	4	3	3	2	3	1	1	2	2	2	0	0	0	0	1	1	1	1	0	0	0	0	0	0	0	0	1	1	0	0	0	0	1	1	1	0.514899
6	1	0	0	1	2	0	1	1	0	1	1	0	1	1	0	0	0	0	1	1	1	1	0	0	0	0	0	0	0	0	1	0	0	0	0	1	2	2	1	2.0347
6	1	1	0	2	3	1	2	3	3	1	1	2	2	3	1	0	0	0	0	0	1	1	0	0	0	0	0	1	0	0	1	1	1	0	0	1	0	1	1	1.16791
6	1	2	1	2	3	1	1	2	1	1	1	2	2	0	1	0	0	0	0	0	1	1	0	0	0	0	0	0	0	1	0	1	0	0	1	0	1	1	1	0.514899
6	1	2	1	4	4	1	3	2	1	1	1	2	0	3	1	0	0	0	0	0	0	1	0	0	0	0	0	0	0	1	1	1	1	1	1	1	1	1	1	0.75822
6	1	2	1	1	3	0	1	2	0	2	0	1	1	2	0	1	0	0	1	1	1	1	1	0	0	0	0	1	0	0	0	1	0	0	0	0	1	2	1	0.514899
6	1	1	0	1	2	0	3	3	0	0	0	3	0	1	1	1	1	1	1	1	1	1	0	0	0	0	0	0	0	0	0	1	0	0	0	0	0	2	1	0.597429
6	1	1	0	2	3	2	3	3	2	1	1	3	1	1	0	0	0	0	1	1	1	1	0	0	0	0	0	0	0	0	0	1	0	0	0	0	0	2	1	0.597429
6	1	1	0	2	2	0	2	2	2	1	0	3	0	1	0	0	0	1	1	1	1	1	0	0	0	0	0	1	0	0	1	1	0	0	0	0	1	2	1	0.514899
6	1	2	1	3	2	1	2	2	0	0	0	0	0	3	1	0	0	0	0	0	0	1	0	1	0	0	0	0	0	0	0	0	0	0	1	1	1	1	1	0.75822
6	1	2	1	4	4	2	3	3	0	2	0	2	0	2	0	0	0	1	1	0	1	1	1	0	0	0	0	1	0	0	0	1	0	0	1	0	1	2	1	0.514899
6	1	1	0	4	4	3	3	3	2	2	1	3	2	3	1	0	0	0	0	0	0	1	0	0	0	0	0	1	0	0	0	1	0	0	0	1	3	1	1	4.28436
6	1	1	0	0																																0	1	2	1	0.514899
7	1	2	1	2	2	0	0	2	1	0	0	0	2	3	1	0	0	0	0	0	1	1	0	0	0	0	0	0	0	0	0	1	1	0	0	1	1	2	1	0.75822
7	1	1	0	2	3	2	2	3	2	1	1	1	0	2	1	0	0	0	0	0	1	1	0	0	0	0	0	1	0	1	1	1	1	0	1	0	1	1	1	0.514899
7	1	1	0	3	4	2	3	3	2	2	2	2	3	2	1	0	0	0	1	1	1	1	0	0	1	0	0	1	0	0	1	0	1	0	0	0	1	2	1	0.514899
7	1	1	0	3	4	1	2	3	2	1	0	1	1	3	0	1	0	0	1	1	1	0	0	0	0	0	0	0	0	0	0	1	0	0	0	0	1	1	1	0.514899
7	1	2	1	0																																1	1	1	1	0.75822
7	1	1	0	2	3	1	2	3	1	2	1	0	0	2	1	0	0	0	0	0	1	1	0	0	0	0	0	1	0	0	0	1	0	0	0	1	0	2	1	1.16791
7	1	2	1	2	2	1	1	1	1	1	1	1	1	3	0	1	0	0	1	1	0	1	0	0	0	0	0	0	0	0	0	1	0	0	0	1	1	1	1	0.75822
7	1	1	0	4	2	1	0	0	1	1	0	0	1	1	0	0	0	0	1	1	1	1	0	0	0	0	0	0	0	0	0	1	0	0	0	1	1	2	1	0.75822
7	1	2	1	0																																1	0	2	1	1.16791
7	1	2	1	0																																0	2	1	1	1.31777
7	1	0	0	1	0	0	0	0	0	0	0	0	0	0	0	0	0	0	0	0	0	0	0	0	0	0	0	0	0	0	0	0	0	0	0	0	2	1	1	1.31777
7	1	1	0	3	3	3	3	3	2	3	2	2	2	3	1	0	0	0	0	0	1	1	0	0	0	0	0	0	0	0	0	1	0	0	0	1	1	2	1	0.75822
7	1	3	1	4	4	2	2	2	2	2	2	2	2	2	1	1	1	1	1	1	1	0	0	1	0	1	0	0	0	0	1	0	1	0	1	1	0	2	1	1.16791
7	1	0	0	0																																0	0	1	1	0.597429
7	1	0	0	0																																0	0	1	1	0.597429
7	1	0	0	0																																0	0	1	1	0.597429
7	1	2	1	1	2	0	0	0	0	0	0	0	0	0	0	0	0	0	1	0	0	0	0	0	0	0	0	0	0	0	0	1	0	0	0	1	0	2	1	1.16791
7	1	1	0	1	3	1	1	2	1	1	1	2	1	2	0	0	1	0	1	1	1	1	0	0	0	0	0	0	0	0	0	1	0	0	0	1	1	2	1	0.75822
7	1	2	1	1	1	0	0	0	0	0	0	0	0	0	0	0	0	0	0	0	0	0	0	0	0	0	0	0	0	0	0	0	0	0	0	0	1	1	1	0.514899
7	1	1	0	2	2	2	3	2	2	2	2	2	3	1	0	0	1	1	0	1	1	1	0	1	0	0	0	0	0	0	0	1	0	0	0	1	1	1	1	0.75822
7	1	2	1	3	3	0	2	1	0	1	0	0	2	1	0	0	1	0	1	1	0	1	0	0	0	0	0	0	0	0	1	1	1	0	1	0	2	2	1	1.31777
7	1	0	0	4	3	0	3	0	1	0	0	1	2	3	0	0	0	0	0	1	1	1	0	0	0	0	0	1	0	0	0	1	0	0	0	0	1	1	1	0.514899
7	1	0	0	4	3	0	3	0	1	0	0	1	2	3	0	0	0	0	0	1	1	1	0	0	0	0	0	1	0	0	0	1	0	0	0	0	1	1	1	0.514899
7	1	2	1	0																																0	1	1	1	0.514899
7	1	2	1	1	2	1	1	1	1	1	1	1	1	1	0	0	0	0	1	1	1	1	0	0	0	0	0	0	0	0	0	1	0	0	0	0	1	2	1	0.514899
7	1	1	0	1	1	2	3	3	2	2	0	3	0	3	1	0	0	0	0	0	0	0	0	0	0	0	0	0	0	0	0	0	0	0	1	1	0	1	1	1.16791
7	1	0	0	1	1	0	0	0	0	0	0	0	0	0	0	0	0	0	0	0	0	0	0	0	0	0	0	0	0	0	0	0	0	0	0	0	2	1	1	1.31777
7	1	1	0	3	3	1	1	1	1	1	1	1	0	2	0	1	1	1	1	1	1	1	1	0	0	0	0	0	0	0	1	1	0	0	0	0	0	2	1	0.597429
7	1	2	1	0																																1	0	2	1	1.16791
7	1	2	1	0																																1	1	2	1	0.75822
7	1	2	1	1	2	1	2	1	2	1	1	0	1	1	1	0	0	0	0	0	1	1	0	0	0	0	0	0	0	1	0	1	0	0	0	0	0	2	1	0.597429
7	1	2	1	0																																0	0	2	1	0.597429
7	1	2	1	0																																0	0	2	1	0.597429
7	1	1	0	4	4	2	2	3	1	1	1	2	2	1	1	1	0	0	0	0	1	1	1	0	0	0	0	1	0	0	0	1	0	0	0	0	2	2	1	1.31777
7	1	1	0	0																																1	0	2	1	1.16791
7	1	2	1	0																																0	1	2	1	0.514899
7	1	1	0	2	3	2	2	3	1	2	1	1	2	3	0	0	0	0	1	1	1	1	0	1	0	0	0	0	0	0	0	0	0	0	1	0	2	2	1	1.31777
7	1	0	0	2	1	0	0	0	0	0	0	0	0	0	0	0	0	0	0	0	0	0	0	0	0	0	0	0	0	0	0	0	0	0	0	1	0	1	1	1.16791
7	1	1	0	0																																0	0	2	1	0.597429
7	1	2	1	0																																1	0	2	1	1.16791
7	1	2	1	0																																1	0	2	1	1.16791
7	1	1	0	0																																1	0	2	1	1.16791
7	1	2	1	0																																1	0	2	1	1.16791
7	1	2	1	0																																0	1	2	1	0.514899
7	1	2	1	0																																1	1	2	1	0.75822
7	1	2	1	0																																0	1	1	1	0.514899
7	1	2	1	1	2	1	1	2	2	1	0	1	0	3	0	1	0	0	1	1	1	1	0	0	0	0	0	1	0	0	1	1	0	0	0	0	0	2	1	0.597429
7	1	2	1	1	2	0	0	2	1	0	0	0	0	2	0	1	0	0	1	1	0	1	0	0	0	0	0	0	0	0	1	0	0	0	0	0	1	1	1	0.514899
7	1	0	0	3	4	2	2	2	0	2	0	1	1	2	1	0	0	0	0	0	1	1	0	0	0	0	0	0	0	0	0	1	0	0	1	0	1	0	1	0.514899
7	1	1	0	0																																0	1	2	1	0.514899
7	1	1	0	0																																1	0	1	1	1.16791
7	1	0	0	1	1	0	0	0	0	0	0	0	0	0	0	0	0	0	0	0	0	0	0	0	0	0	0	0	0	0	0	0	0	0	0	0	1	1	1	0.514899
7	1	0	0	2	1	0	0	0	0	0	0	0	0	0	0	0	0	0	0	0	0	0	0	0	0	0	0	0	0	0	0	0	0	0	0	1	1	2	1	0.75822
7	1	2	1	3	3	2	3	3	2	3	3	3	3	3	0	0	0	0	0	1	0	1	1	0	0	0	0	1	0	0	1	1	0	0	0	0	1	2	1	0.514899
7	1	1	0	3	3	2	2	2	2	2	2	2	2	3	0	1	0	0	1	1	1	1	0	0	0	0	0	1	0	1	1	1	0	0	0	0	1	1	1	0.514899
7	1	2	1	4	4	3	2	3	2	2	2	2	2	3	0	1	1	1	1	1	1	1	1	1	0	0	0	1	0	0	1	1	0	0	0	1	2	1	1	2.0347
7	1	2	1	0																																0	2	2	1	1.31777
7	1	2	1	0																																1	0	1	1	1.16791
7	1	2	1	0																																0	1	1	1	0.514899
7	1	2	1	0																																0	1	1	1	0.514899
7	1	1	0	0																																0	2	1	1	1.31777
7	1	0	0	0																																1	2	1	1	2.0347
7	1	2	1	2	3	0	0	0	0	0	0	0	0	1	0	0	0	1	1	0	1	1	1	0	0	0	0	1	0	0	1	1	0	0	0	0	1	2	1	0.514899
7	1	1	0	3	3	1	1	2	0	1	0	1	1	2	1	0	0	0	0	0	1	1	0	0	0	0	0	0	0	0	0	1	0	0	0	0	3	1	1	4.88382
7	1	2	1	4	4	2	3	3	0	2	1	3	0	3	1	1	1	1	1	1	1	1	0	0	0	0	0	1	0	1	1	1	1	1	1	0	0	2	1	0.597429
7	1	2	1	4	4	2	3	3	0	2	1	3	0	3	1	1	1	1	1	1	1	1	0	0	0	0	0	1	0	1	1	1	1	1	1	0	0	2	1	0.597429
7	1	2	1	4	3	1	3	2	2	0	0	2	0	1	1	0	0	0	0	0	0	1	0	0	0	0	0	0	0	0	1	0	0	0	0	0	1	1	1	0.514899
7	1	1	0	3	3	2	3	2	2	2	2	2	1	3	1	0	0	0	0	0	0	1	0	0	0	0	0	0	0	0	0	0	0	0	1	0	1	1	1	0.514899
7	1	2	1	4	3	2	2	2	0	0	0	3	1	1	0	0	0	0	0	1	0	1	0	0	0	0	0	0	0	0	0	1	0	0	0	1	0	2	1	1.16791
7	1	1	0	4	4	3	3	3	3	3	3	3	3	3	0	0	0	0	1	1	1	1	1	0	0	0	0	0	0	0	0	0	0	0	1	0	2	2	1	1.31777
7	1	2	1	0																																1	1	2	1	0.75822
7	1	1	0	2	2	1	1	2	2	1	1	3	1	1	0	0	1	0	1	1	0	1	0	1	0	0	0	1	0	0	1	0	0	0	1	0	1	2	1	0.514899
7	1	1	0	2	1	1	1	1	0	0	0	0	0	0	0	0	0	0	1	1	0	1	0	0	0	0	0	0	0	0	1	1	0	0	0	1	2	1	1	2.0347
7	1	1	0	3	3	1	1	3	1	1	1	2	2	3	0	0	0	0	1	1	1	1	0	0	0	0	0	0	0	0	0	1	0	0	0	1	1	2	1	0.75822
7	1	2	1	1	2	1	1	2	0	2	1	1	1	1	0	1	0	0	1	1	1	1	0	0	0	0	0	0	0	0	0	1	1	0	0	1	0	2	1	1.16791
7	1	1	0	2	2	1	2	1	0	0	0	1	0	1	1	0	0	0	0	0	1	1	0	0	0	0	0	0	0	0	0	1	0	0	0	0	0	2	1	0.597429
7	1	2	1	2	3	2	1	0	1	1	1	0	2	1	0	0	1	0	1	1	1	1	1	0	0	0	0	0	0	0	1	0	0	0	0	0	1	1	1	0.514899
7	1	2	1	1	2	0	0	2	0	0	0	0	1	3	1	0	0	0	0	0	1	1	0	0	0	0	0	0	0	0	0	1	0	0	1	0	0	2	1	0.597429
8	1	2	1	0																																1	2	2	1	2.0347
8	1	1	0	1	2	0	0	1	0	0	0	0	1	2	0	0	0	0	1	1	0	1	0	0	0	0	0	0	0	0	1	0	0	1	1	1	1	1	1	0.75822
8	1	1	0	4	3	1	1	2	2	0	0	0	2	2	1	0	0	0	0	0	1	1	0	0	0	0	0	0	0	0	0	0	0	0	1	0	1	1	1	0.514899
8	1	1	0	1	2	0	1	1	0	0	0	0	0	0	1	0	0	0	0	0	1	1	0	0	0	0	0	0	0	0	0	0	0	0	1	1	2	1	1	2.0347
8	1	1	0	2	2	1	2	1	0	1	0	0	2	1	0	0	1	0	0	1	1	1	0	0	0	0	0	0	0	0	0	1	0	0	0	0	1	2	1	0.514899
8	1	2	1	0																																0	0	2	1	0.597429
8	1	1	0	1	1	0	0	0	0	0	0	0	0	1	0	0	0	0	1	0	1	1	0	0	0	0	0	0	0	0	0	0	0	0	1	0	0	2	1	0.597429
8	1	2	1	1	1	0	0	0	0	0	0	0	0	0	0	0	0	0	0	0	0	0	0	0	0	0	0	0	0	0	0	0	0	0	0	0	1	1	1	0.514899
8	1	1	0	1	2	1	2	1	1	1	1	1	1	1	0	0	0	0	0	1	0	1	0	0	0	0	0	0	0	0	0	1	0	0	0	1	1	1	1	0.75822
8	1	1	0	3	3	0	0	1	0	0	0	0	0	2	1	0	0	0	0	0	1	1	0	0	0	0	0	0	0	0	0	1	1	1	0	0	0	2	1	0.597429
8	1	1	0	3	1	0	0	0	0	0	0	0	0	0	0	0	0	0	0	0	0	0	0	0	0	0	0	0	0	0	0	0	0	0	0	0	0	1	1	0.597429
8	1	1	0	0																																0	0	2	1	0.597429
8	1	2	1	0																																0	1	2	1	0.514899
8	1	2	1	0																																0	0	1	1	0.597429
8	1	1	0	0																																0	0	1	1	0.597429
8	1	2	1	2	3	0	1	2	1	1	0	2	0	3	0	0	0	1	1	1	1	1	0	0	0	0	0	0	0	0	0	1	0	0	0	0	0	1	1	0.597429
8	1	2	1	3	3	1	1	2	1	2	1	1	1	1	0	0	0	0	1	1	1	1	0	1	0	0	0	0	0	0	0	0	0	0	1	0	1	1	1	0.514899
8	1	1	0	4	3	2	3	3	2	1	1	2	2	3	0	1	1	1	1	1	1	1	1	1	0	0	0	1	0	1	1	1	1	0	1	1	2	1	1	2.0347
8	1	2	1	0																																0	0	1	1	0.597429
8	1	2	1	1	2	0	0	1	1	0	1	0	0	3	0	0	0	0	1	1	1	1	0	0	0	0	0	0	0	0	1	1	0	0	0	1	0	2	1	1.16791
8	1	2	1	1	1	0	0	0	0	0	0	0	0	0	0	0	0	0	0	0	0	0	0	0	0	0	0	0	0	0	0	0	0	0	0	0	0	1	1	0.597429
8	1	1	0	0																																0	2	2	1	1.31777
8	1	2	1	1	2	1	1	3	1	1	1	1	1	3	0	1	0	0	1	1	0	1	0	0	0	0	0	0	0	0	1	0	1	0	0	0	1	2	1	0.514899
8	1	2	1	1	2	0	0	0	0	0	0	0	0	1	1	0	0	0	0	0	1	1	0	0	0	0	0	0	0	0	0	0	0	0	1	1	1	2	1	0.75822
8	1	1	0	1	3	0	1	2	2	0	0	0	0	2	0	1	0	0	1	0	1	0	0	0	0	0	0	0	0	0	0	0	0	0	1	1	1	1	1	0.75822
8	1	1	0	2	2	1	1	2	0	0	0	0	0	1	0	0	0	0	1	1	1	1	0	0	0	0	0	0	0	0	1	0	0	0	0	1	1	1	1	0.75822
8	1	2	1	0																																0	1	1	1	0.514899
8	1	2	1	1	0	0	0	0	0	0	0	0	0	0	0	0	0	0	0	0	0	0	0	0	0	0	0	0	0	0	0	0	0	0	0	0	2	1	1	1.31777
8	1	2	1	2	2	1	2	2	1	1	1	2	0	1	0	0	0	0	1	1	0	0	0	0	0	0	0	0	0	0	0	0	0	0	1	1	0	2	1	1.16791
8	1	2	1	2	3	1	3	3	2	2	2	3	2	2	1	0	0	0	0	0	1	1	0	0	0	0	0	1	0	1	1	1	1	0	1	0	2	1	1	1.31777
8	1	1	0	3	2	1	1	1	0	0	0	0	1	1	1	0	0	0	0	0	0	1	1	0	0	0	0	0	0	0	0	0	0	0	1	0	1	2	1	0.514899
8	1	1	0	4	4	3	3	3	3	3	3	3	3	3	1	0	0	0	0	0	1	1	1	0	0	0	0	1	0	0	1	1	1	0	0	0	1	1	1	0.514899
8	1	0	0	0																																1	1	2	1	0.75822
8	1	2	1	2	2	1	2	2	1	0	0	0	0	2	1	0	0	0	0	0	1	1	0	0	0	0	0	1	0	0	0	1	0	0	0	1	0	2	1	1.16791
8	1	1	0	2	3	1	2	3	1	1	1	1	1	1	1	0	0	0	0	0	1	1	0	0	0	0	0	0	0	0	0	1	0	0	0	0	1	1	1	0.514899
8	1	3	1	0																																0	0	2	1	0.597429
8	1	1	0	1	2	0	1	1	0	0	0	0	0	2	0	0	1	1	1	1	0	1	0	0	0	0	0	0	0	0	0	0	0	0	1	0	1	1	1	0.514899
8	1	1	0	1	2	0	2	1	1	1	0	0	1	2	0	0	0	0	1	1	1	1	0	0	0	0	0	0	0	0	0	0	0	0	1	1	1	1	1	0.75822
8	1	2	1	1	0	0	0	0	0	0	0	0	0	0	0	0	0	0	0	0	0	0	0	0	0	0	0	0	0	0	0	0	0	0	0	1	1	1	1	0.75822
8	1	1	0	2	2	0	1	0	0	0	0	0	1	1	0	0	0	0	1	1	0	1	0	0	0	0	0	0	0	0	0	0	0	0	1	0	1	1	1	0.514899
8	1	2	1	4	3	0	1	0	0	0	0	1	0	2	1	0	0	0	0	0	0	0	0	0	0	0	0	0	0	0	0	1	0	0	0	0	1	2	1	0.514899
8	1	1	0	0																																1	3	0	1	4.28436
8	1	2	1	1	4	1	1	1	0	0	0	0	2	3	1	0	0	0	0	0	1	1	1	0	0	0	0	0	0	1	1	1	1	0	1	1	1	2	1	0.75822
8	1	1	0	2	2	1	1	0	1	1	0	0	0	1	1	0	0	0	0	0	1	0	0	0	0	0	0	0	0	0	0	0	0	0	1	1	1	1	1	0.75822
8	1	2	1	0																																0	1	2	1	0.514899
8	1	1	0	4	3	2	3	3	2	2	2	3	2	2	0	0	1	1	1	1	1	1	0	0	0	0	0	1	0	0	0	1	0	0	1	0	2	2	1	1.31777
8	1	2	1	0																																0	1	1	1	0.514899
8	1	2	1	2	4	0	0	3	0	0	0	0	0	3	1	0	0	0	0	0	0	1	0	0	0	0	0	0	0	0	0	0	0	0	1	0	1	1	1	0.514899
9	1	2	1	1	2	0	1	1	1	0	0	0	0	2	0	0	0	0	1	1	1	1	0	0	0	0	0	0	0	0	0	0	0	0	1	0	2	1	1	1.31777
9	1	2	1	0																																1	0	2	1	1.16791
9	1	2	1	0																																1	0	2	1	1.16791
9	1	1	0	0																																0	1	2	1	0.514899
9	1	2	1	0																																0	1	1	1	0.514899
9	1	2	1	0																																0	2	1	1	1.31777
9	1	1	0	4	4	1	3	3	2	2	2	2	2	2	0	1	0	0	1	0	0	1	0	0	0	0	0	0	0	0	1	1	0	0	0	1	1	1	1	0.75822
9	1	2	1	3	2	0	0	1	0	0	0	0	0	1	0	0	0	0	1	1	0	0	0	0	0	0	0	0	0	0	0	1	0	0	0	1	0	1	1	1.16791
9	1	2	1	0																																1	1	1	1	0.75822
9	1	0	0	2	1	0	0	0	0	0	0	0	0	0	0	0	0	0	0	0	0	0	0	0	0	0	0	0	0	0	0	0	0	0	0	1	1	1	1	0.75822
9	1	2	1	0																																1	0	2	1	1.16791
9	1	0	0	0																																0	1	2	1	0.514899
9	1	0	0	1	0	0	0	0	0	0	0	0	0	0	0	0	0	0	0	0	0	0	0	0	0	0	0	0	0	0	0	0	0	0	0	1	2	1	1	2.0347
9	1	0	0	1	4	3	2	3	3	2	2	1	3	3	0	0	1	0	1	1	1	1	0	0	0	0	0	0	0	0	0	1	0	0	0	0	1	2	1	0.514899
9	1	2	1	2	3	1	3	3	0	1	0	2	1	1	0	0	0	0	1	1	1	1	0	0	0	0	0	0	0	0	0	0	0	0	1	0	1	1	1	0.514899
9	1	1	0	4	1	3	3	3	3	3	3	3	2	1	0	0	0	1	1	1	1	0	0	0	0	0	0	0	0	0	0	1	0	0	0	0	1	1	1	0.514899
9	1	1	0	1	3	1	0	1	0	1	0	0	0	1	0	1	0	0	1	1	1	1	1	0	0	0	0	0	0	1	1	0	0	0	0	1	2	1	1	2.0347
9	1	2	1	2	2	1	0	1	1	0	0	0	1	1	0	0	1	1	0	0	1	1	0	0	0	0	0	0	0	0	1	0	0	0	0	1	1	1	1	0.75822
9	1	2	1	0																																0	1	2	1	0.514899
9	1	0	0	1	1	0	0	0	0	0	0	0	0	0	0	0	0	0	0	0	0	0	0	0	0	0	0	0	0	0	0	0	0	0	0	0	1	2	1	0.514899
9	1	2	1	1	2	0	1	2	1	0	0	0	0	1	0	0	0	0	1	1	0	1	0	0	0	0	0	0	0	0	0	0	0	0	1	0	1	2	1	0.514899
10	1	2	1	3	3	0	0	0	0	0	0	0	0	1	0	0	0	0	0	1	1	0	0	0	0	0	0	0	0	0	0	0	0	0	1	0	0	2	1	0.597429
10	1	1	0	2	2	2	1	1	0	0	1	1	2	2	0	0	0	0	1	1	0	1	0	0	0	0	0	0	0	0	0	0	0	0	1	1	1	1	1	0.75822
10	1	2	1	2	2	1	0	1	0	0	0	0	0	1	0	0	0	0	1	0	0	1	0	0	0	0	0	0	0	0	0	1	0	0	0	1	2	1	1	2.0347
10	1	2	1	4	4	2	2	3	2	1	1	2	2	3	0	0	1	1	0	0	1	1	0	1	0	0	0	0	0	0	0	1	0	0	0	1	2	2	1	2.0347
10	1	2	1	4	3	0	0	0	0	0	0	0	0	3	1	0	0	0	0	0	0	1	0	0	0	0	0	0	0	0	1	0	0	0	0	1	1	1	1	0.75822
10	1	2	1	1	2	0	0	0	0	0	0	0	0	0	0	0	1	1	1	1	1	1	0	0	0	0	0	1	0	0	0	1	0	0	0	0	1	1	1	0.514899
2	0	2	1	2	3	1	0	0	0	0	0	0	0	1	0	0	0	0	1	1	1	1	1	1	0	0	0	0	0	0	0	0	0	0	1	0	1	2	0	0.514899
2	0	0	0	4	4	2	2	3	1	0	1	2	3	3	1	0	0	0	1	1	1	1	1	1	0	0	1	1	0	0	0	1	1	0	0	1	3	0	0	4.28436
3	0	1	0	3	3	2	3	2	2	3	2	3	2	3	0	0	0	0	1	1	1	1	1	0	0	0	0	1	0	0	0	1	0	0	1	1	3	0	0	4.28436
3	0	1	0	4	3	2	2	2	2	2	2	2	2	3	0	0	0	0	1	1	1	1	1	0	0	0	0	1	0	0	0	1	0	0	1	0	3	0	0	4.88382
3	0	1	0	3	3	2	2	3	2	0	3	1	1	3	0	1	1	0	1	1	0	1	1	0	0	0	0	1	0	0	0	1	1	0	0	1	3	0	0	4.28436
3	0	2	1	2	4	2	2	2	2	2	2	2	2	3	0	0	0	0	0	1	0	1	0	0	0	0	0	0	0	0	0	0	0	0	1	1	1	2	0	0.75822
3	0	1	0	2	2	2	2	2	2	2	1	0	1	1	0	0	0	0	0	1	0	1	0	0	0	0	0	1	0	0	0	1	0	0	0	0	1	1	0	0.514899
3	0	1	0	4	4	0	3	0	3	0	0	3	0	3	1	0	0	0	0	0	0	0	0	0	0	0	0	0	0	0	0	1	0	0	0	1	3	0	0	4.28436
4	0	2	1	0																																0	1	2	0	0.514899
4	0	2	1	2	3	1	2	1	3	2	1	2	1	3	1	0	0	0	0	0	1	0	0	0	0	0	0	0	0	0	0	0	0	0	1	0	0	2	0	0.597429
5	0	0	0	2	2	1	1	1	1	1	1	1	1	1	0	0	0	0	1	1	1	1	0	0	0	0	0	0	0	0	0	0	0	0	1	0	0	0	0	0.597429
5	0	1	0	2	2	1	2	2	1	1	1	1	1	3	1	0	0	0	0	0	0	1	0	0	0	0	0	0	0	0	0	0	0	0	1	0	3	0	0	4.88382
5	0	1	0	0																																0	2	1	0	1.31777
5	0	0	0	4	3	2	1	2	2	2	2	2	2	3	1	0	0	0	0	0	1	1	0	1	0	0	0	1	0	0	0	1	1	0	0	0	2	1	0	1.31777
5	0	0	0	0																																0	0	0	0	0.597429
5	0	1	0	0																																0	3	1	0	4.88382
5	0	0	0	3	2	2	3	3	2	3	3	3	3	3	0	1	1	0	1	0	1	1	0	0	0	0	1	1	0	0	0	1	0	0	0	0	2	1	0	1.31777
5	0	1	0	3	3	1	3	3	2	3	1	2	3	1	0	1	0	0	0	0	1	0	0	0	0	0	0	0	0	0	0	1	0	0	0	0	1	1	0	0.514899
5	0	1	0	4	4	3	3	3	3	3	3	3	2	2	0	1	1	1	1	1	1	1	0	0	0	0	0	1	0	0	0	0	0	0	1	1	1	2	0	0.75822
5	0	3	1	4	4	3	0	1	0	0	0	0	0	1	0	1	0	0	1	1	1	0	0	0	0	0	0	0	0	0	1	0	0	0	1	1	3	1	0	4.28436
5	0	0	0	4	4	0	0	0	0	0	0	0	0	0	1	0	0	0	0	0	1	1	0	0	0	0	0	0	0	0	0	1	0	0	0	0	1	0	0	0.514899
5	0	1	0	1	2	0	2	0	0	0	0	0	0	1	0	0	0	0	0	1	0	1	0	0	0	0	0	0	0	0	1	0	0	0	0	0	2	2	0	1.31777
6	1	1	0	1	2	0	1	1	1	0	0	1	0	1	0	1	0	0	1	1	1	1	0	0	0	0	0	0	0	0	0	0	0	0	1	0	0	2	0	0.597429
6	1	3	1	1	1	0	0	0	0	0	0	0	0	0	0	0	0	0	0	0	0	0	0	0	0	0	0	0	0	0	0	0	0	0	0	1	0	2	0	1.16791
6	1	2	1	0																																1	0	2	0	1.16791
7	1	2	1	0																																0	0	2	0	0.597429
7	1	0	0	0																																0	1	1	0	0.514899
7	1	2	1	1	2	1	1	1	1	1	1	0	1	1	0	0	0	0	0	1	1	1	0	0	0	0	0	0	0	0	0	0	0	0	1	0	2	1	0	1.31777
7	1	1	0	2	2	0	0	0	0	0	0	0	0	1	0	0	0	0	1	1	0	0	0	0	0	0	0	0	0	1	0	0	0	0	0	0	1	1	0	0.514899
7	1	2	1	3	3	0	1	0	0	1	0	3	0	1	0	0	0	0	1	1	1	1	0	0	0	0	0	1	0	0	0	1	0	0	0	0	1	2	0	0.514899
7	1	0	0	3	3	2	2	2	1	1	2	2	2	0	0	0	1	0	1	1	0	1	0	0	0	0	0	1	0	0	0	0	0	1	1	1	2	1	0	2.0347
7	1	2	1	4	4	2	2	2	1	1	1	1	3	3	1	0	0	0	0	0	1	1	0	0	0	0	0	0	0	0	1	1	0	0	0	1	0	1	0	1.16791
7	1	1	0	0																																0	0	2	0	0.597429
7	1	0	0	1	2	0	0	0	0	0	0	0	0	0	0	0	0	0	0	0	0	0	0	0	0	0	0	0	0	0	0	0	0	0	0	1	3	0	0	4.28436
7	1	2	1	2	2	2	2	2	2	2	2	2	2	3	1	0	0	0	0	0	0	1	1	0	0	0	0	0	0	0	0	0	0	0	1	0	1	1	0	0.514899
7	1	0	0	4	4	3	2	3	2	2	2	2	2	3	0	0	1	0	1	1	1	1	0	1	0	0	0	0	0	0	0	1	0	0	0	1	1	2	0	0.75822
7	1	0	0	3	3	2	2	2	2	2	2	2	2	2	1	0	0	0	0	0	1	1	0	0	0	0	0	1	0	0	0	1	0	0	1	1	3	2	0	4.28436
7	1	0	0	3	4	3	3	3	3	3	1	1	3	2	1	0	0	0	0	0	0	1	0	0	0	0	0	1	0	0	0	1	0	0	0	0	3	0	0	4.88382
8	1	1	0	1	4	0	0	0	0	0	0	0	0	3	1	0	0	0	0	0	1	1	0	0	0	0	0	0	0	1	1	1	1	1	1	1	1	2	0	0.75822
8	1	0	0	0																																0	2	2	0	1.31777
8	1	1	0	1	4	3	3	3	3	2	2	3	2	3	1	0	0	0	0	0	1	1	0	0	0	0	0	0	0	0	0	1	0	0	0	0	1	1	0	0.514899
8	1	0	0	0																																0	0	2	0	0.597429
8	1	2	1	0																																1	0	2	0	1.16791
8	1	1	0	0																																1	2	2	0	2.0347
8	1	3	1	0																																1	3	1	0	4.28436
8	1	2	1	2	2	2	1	1	1	1	1	1	1	2	0	1	0	0	1	1	1	1	0	0	0	0	0	0	0	0	0	0	0	0	1	1	1	1	0	0.75822
8	1	0	0	4	4	3	3	3	3	0	2	1	3	3	0	0	1	0	1	1	1	1	0	0	0	0	0	1	0	0	1	1	0	0	0	0	1	1	0	0.514899
8	1	2	1	3	3	1	2	3	1	1	0	3	2	2	0	1	1	1	0	1	1	1	1	0	0	0	0	0	0	0	0	1	1	0	1	1	1	1	0	0.75822
8	1	2	1	3	4	2	3	2	1	2	1	2	1	3	0	0	0	1	1	1	1	1	0	0	0	0	0	0	0	0	1	1	1	0	0	1	1	1	0	0.75822
8	1	2	1	1	1	0	0	0	0	0	0	0	0	0	0	0	0	0	0	0	0	0	0	0	0	0	0	0	0	0	0	0	0	0	0	0	2	1	0	1.31777
8	1	1	0	3	3	2	2	3	0	0	1	1	1	3	0	0	0	1	1	1	1	1	0	0	0	0	0	1	0	0	0	1	1	0	1	0	3	0	0	4.88382
9	1	0	0	1	0	0	0	0	0	0	0	0	0	0	0	0	0	0	0	0	0	0	0	0	0	0	0	0	0	0	0	0	0	0	0	0	0	1	0	0.597429
9	1	1	0	0																																0	1	1	0	0.514899
10	1	0	0	0																																0	3	1	0	4.88382
10	1	1	0	3	3	2	3	3	2	2	3	2	3	3	0	1	0	0	1	1	1	1	0	0	0	0	0	1	0	0	0	0	0	0	1	1	1	1	0	0.75822
