# Supplementary material
Source: Preprints.org preprint supplement (doi:10.20944/preprints202110.0096.v1)
Supplement: Supplementary file 4 [file Supplementary material Survey.docx]

Online questionnaire design

The Chinese University of Hong Kong

Questionnaire on Bedbug Infestation Control in Hong Kong

This is a research survey on bedbug infestations in Hong Kong. It aims to understand the bedbug situation in Hong Kong, its impact, and how the housing situation is related to infestations. Results from this study are expected to help residents deal with bedbug infestations in the long run. You are eligible to participate if you are at least 18-year-old and living in Hong Kong.

This research has been approved by the Survey and Behavioural Research Ethics Committee of The Chinese University of Hong Kong.

By agreeing to participate in this research, you allow the research team to collect your survey responses. If follow-up visits are arranged, you agree to allow the research team to take pictures of your home to better understand the bedbug infestation. The information you provide to us will be kept strictly confidential and will only be used for this research. It takes about 20 minutes to complete this questionnaire.

Participating in this research will not bring you any personal benefits. Your participation is completely voluntary. You may refuse to participate in the research and withdraw from the questionnaire even while it is in progress. Your decision to refuse or withdraw from the study will not lead to any adverse consequences.

If you have any questions about this research now or in the future, please contact researcher Wong Hung (Tel: 3943 7510 Email: hwong@cuhk.edu.hk). If you want to know more about your rights as a research participant, please contact the Survey and Behavioural Research Ethics Committee of The Chinese University of Hong Kong (email: fssc02@cuhk.edu.hk).

If you understand the above information and are willing to participate in this research, please select “Agree”.

Agree

1. Please rate your health status today on a scale of 1 (worse possible health you can imagine) to 10 (best possible health you can imagine) below.

| 1 | 2 | 3 | 4 | 5 | 6 | 7 | 8 | 9 | 10 |
| --- | --- | --- | --- | --- | --- | --- | --- | --- | --- |

1. Over the past month, how many hours of sleep do you have each day?

<5 hours

5-6 hours

7-9 hours

>9 hours

1. In the past year, how often did you see bedbugs in your place of residence?

Very often

Often

Sometimes

Rarely

Never (skip to question 10)

1. In the past year, have you been severely troubled by bedbugs?

Not severe at all

Mildly severe

Moderately severe

Severe

Extremely severe

1. In the past month, how severely has bedbugs impacted your daily life?

|  | No impact | Slight | Moderate | Severe |
| --- | --- | --- | --- | --- |
| Physical health |  |  |  |  |
| Mental and emotional health |  |  |  |  |
| Sleeping quality |  |  |  |  |
| Physical appearance |  |  |  |  |
| Work and academic performance |  |  |  |  |
| Social activities |  |  |  |  |
| Avoidance to go home |  |  |  |  |
| Spend money buying medication or seeing the doctor |  |  |  |  |

1. In the past month, how many times have you been bitten by bedbugs?

0

1-4

5-10

>10

1. Where did bedbugs bite you? (Multiple selection allowed, leave blank if none)

Whole body

Head and neck

Chest and back

Belly

Arms

Legs

Others (please specify): __________

1. What was the reaction after being bitten by bedbugs? (Multiple selection allowed, leave blank if none)

Redness and swelling of the skin

Itchiness

Pain at the site of bite

Bleeding at the site of bite

Fever

Difficulties breathing

Headache

Difficulties sleeping or restlessness

Others (please specify): __________

1. When do bedbugs bite you? (Multiple selection allowed)

Daytime

Night (before sleeping)

During sleep

Watching TV or otherwise being still

Holding clothes or umbrellas

Irregularly

Other times (please specify): __________

1. Sex

Male

Female

1. Age

0-24

25-44

45-64

≥65

1. Education level

Primary education or below

Secondary education

Tertiary education

1. Monthly household income (HKD)

<HKD10,000

HKD10,000-30,000

HKD30,001-50,000
HKD50,001-80,000

Please leave your contact information if you would like to be involved in future bedbug related research conducted by the CUHK Anti-bedbug Research Action Group.

Telephone: __________

Email: __________
